# Supplementary material for: Reactivity enhancement of a diphosphene by reversible N-heterocyclic carbene coordination
Source: PubMed Central journal article supplement — Chem Sci. 2018 Mar 27;9(18):4235–43. doi: 10.1039/c8sc00348c (PMC5944230; doi:10.1039/c8sc00348c), 2018-03-27
Supplement: SC-009-C8SC00348C-s001.pdf [file SC-009-C8SC00348C-s001.pdf]

## Supporting Information

for

### Reactivity Enhancement of a Diphosphene by Reversible *N*-Heterocyclic Carbene Coordination

Debabrata Dhara,<sup>a</sup> Pankaj Kalita,<sup>b</sup> Subhadip Mondal,<sup>a</sup> Ramakirushnan Suriya Narayanan,<sup>a</sup> Kaustubh R. Mote,<sup>a</sup> Volker Huch,<sup>c</sup> Michael Zimmer,<sup>c</sup> Cem B. Yildiz,<sup>\*d</sup> David Scheschkewitz,<sup>\*c</sup> Vadapalli Chandrasekhar<sup>\*a,e</sup> and Anukul Jana<sup>\*a</sup>

|                                                                    |     |
|--------------------------------------------------------------------|-----|
| 1. Content                                                         | S1  |
| 2. Thermodynamic data of equilibrium between <b>1</b> and <b>3</b> | S2  |
| 3. Solution state NMR spectra                                      | S3  |
| 4. CP-MAS NMR spectra                                              | S15 |
| 5. UV/vis spectra                                                  | S18 |
| 6. Simulation of NMR spectrum of <b>6</b>                          | S24 |
| 7. Crystallographic details                                        | S25 |
| 8. Computational details                                           | S30 |
| 9. References                                                      | S50 |

---

a Tata Institute of Fundamental Research Hyderabad  
Gopanpally, Hyderabad-500107  
Telangana, India  
E-mail: ajana@tifrh.res.in

b School of Chemical Sciences, National Institute of Science Education and Research, Bhipur-Padanpur,  
Jatni, Khurda, Bhubaneswar-752050, Odisha, India

c Krupp-Chair of General and Inorganic Chemistry, Saarland University, 66123 Saarbrücken, Germany  
E-mail: scheschkewitz@mx.uni-saarland.de

d Department of Medicinal and Aromatic Plants, University of Aksaray, Aksaray, Turkey  
E-mail: cemburakyildiz@aksaray.edu.tr

e Department of Chemistry, Indian Institute of Technology Kanpur, Kanpur-208016, India  
E-mail: vc@iitk.ac.in

### Thermodynamic data of equilibrium between 1 and 3 from NMR spectroscopy:

A 0.0805 M solution (0.4 mL of tol-d8) of 1 and 2 was taken in NMR tube and  $^{31}\text{P}$ , and  $^1\text{H}$  spectra was measured 10 K interval starting at 253 K up to 293 K. The Integration of  $^{31}\text{P}$  resonance of  $\text{P}_2$  alone and adduct allowed the concentration of both the component to be measured. The equilibrium constants were calculated in usual way.

**Table S1** Concentrations for 1, 2, and 3 determined via  $^{31}\text{P}$  NMR spectroscopy at a range of temperatures.

| T / K | [1] / mM | [2] / mM | [3] / mM | K / M   | $\Delta\text{G} / \text{kJ mol}^{-1}$ |
|-------|----------|----------|----------|---------|---------------------------------------|
| 253   | 4.83     | 4.83     | 75.67    | 3243.62 | 17.01                                 |
| 263   | 7.24     | 7.24     | 73.25    | 1397.43 | 15.84                                 |
| 273   | 10.46    | 10.46    | 70.03    | 640.06  | 14.67                                 |
| 283   | 16.1     | 16.1     | 64.4     | 248.44  | 12.97                                 |
| 293   | 21.73    | 21.73    | 58.76    | 124.44  | 11.75                                 |

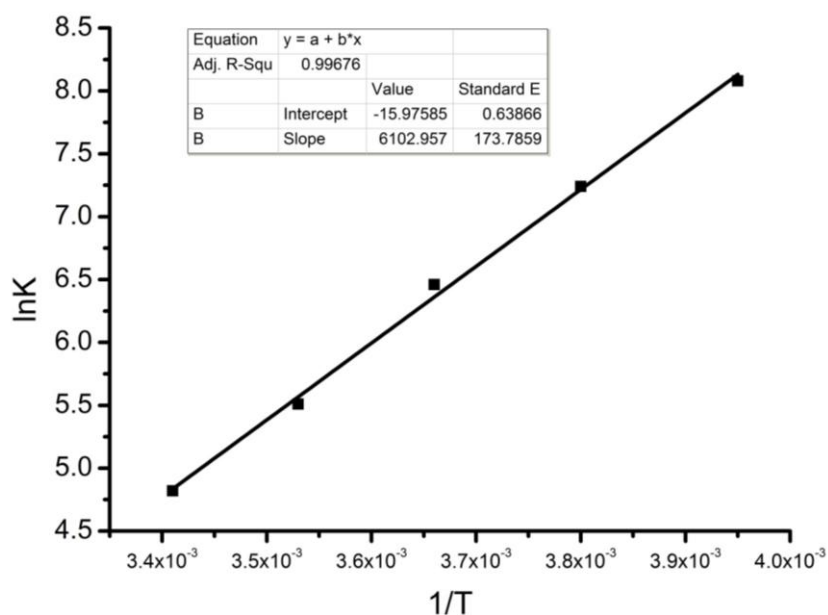

**Figure S1** Plot of  $1/T$  vs  $\ln K$  for the determination of the constant  $K$  for the equilibrium between 1+2 and 3.

The linear regression of  $1/T$  vs  $\ln K$  allowed to determine the value of  $\Delta\text{H} = -50.74 \pm 1.09 \text{ kJmol}^{-1}$ ,  $\Delta\text{G}_{298} = -11.15 \pm 1.07 \text{ kJmol}^{-1}$ ,  $\Delta\text{S}_{298} = -132.85 \pm 2.56 \text{ Jmol}^{-1}\text{K}^{-1}$

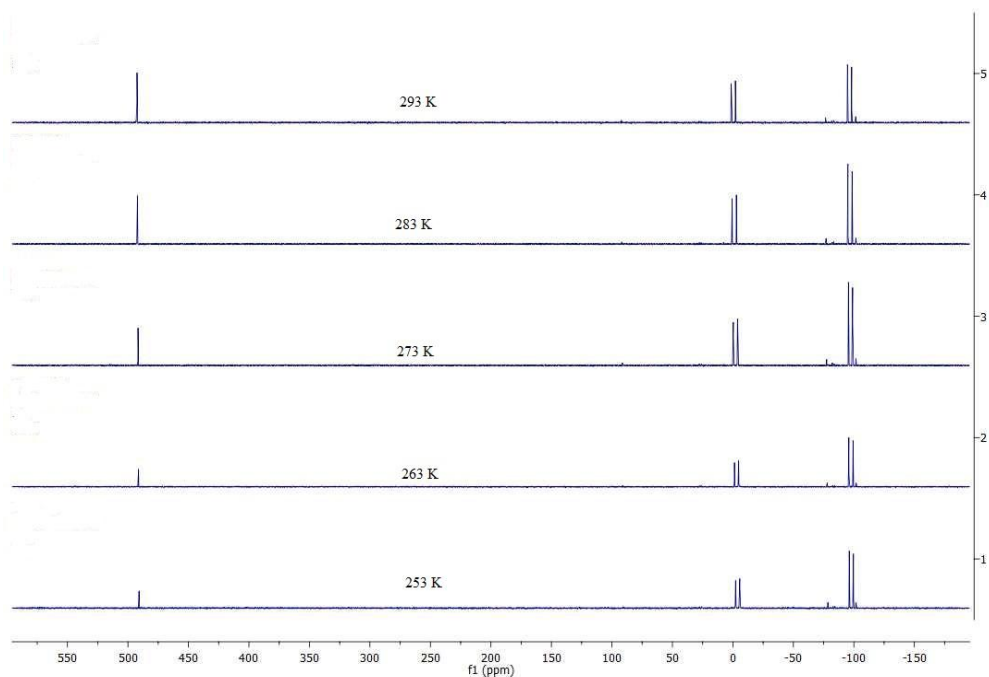

**Figure S2** VT-NMR spectra of 1:1 mixture of **1** and **2** in toluene- $d_8$ .

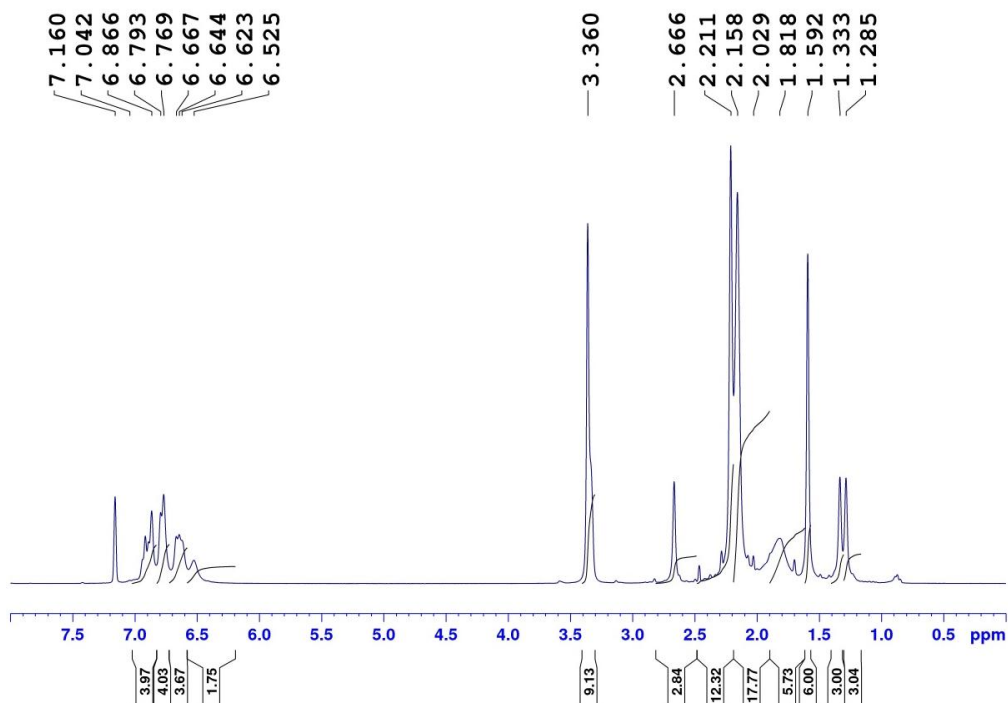

**Figure S3**  $^1\text{H}$  NMR spectrum of 1:2 mixture of **1** and **2** in benzene- $d_6$  at RT.

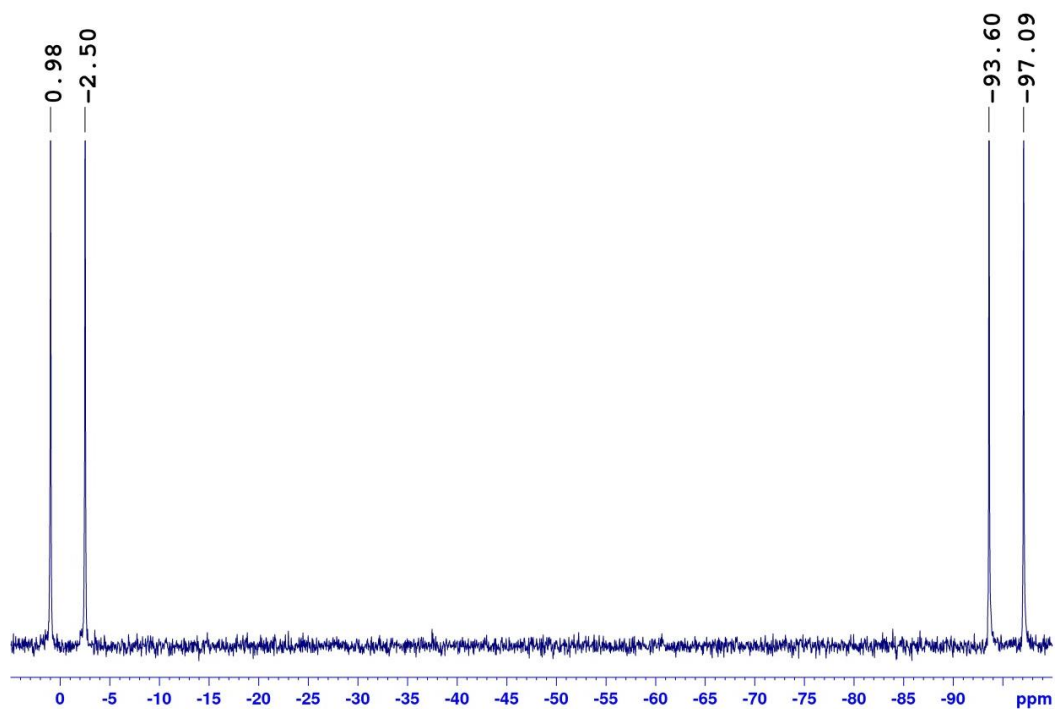

**Figure S4**  $^{31}\text{P}\{^1\text{H}\}$  NMR spectrum of 1:2 mixture of **1** and **2** in benzene- $d_6$  at RT.

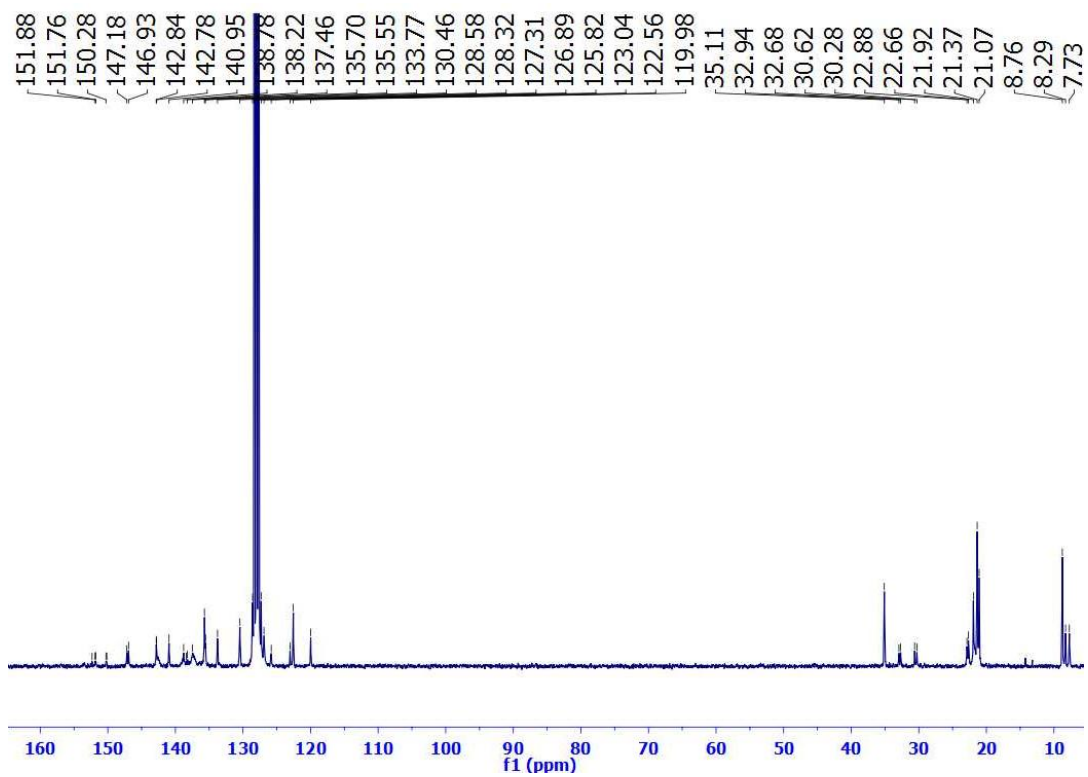

**Figure S5**  $^{13}\text{C}\{^1\text{H}\}$  NMR spectrum of 1:2 of **1** and **2** in benzene- $d_6$  at RT.

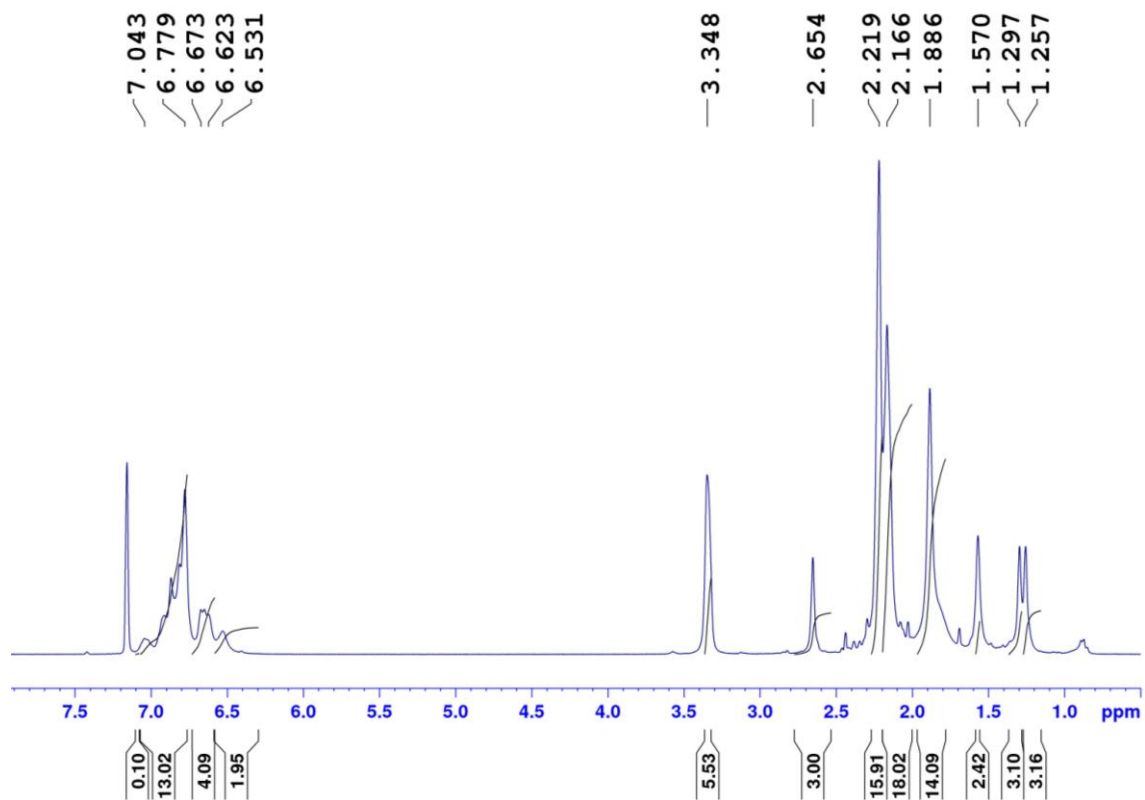

Figure S6  $^1\text{H}$  NMR spectrum of 1:1 of **1** and **2** in benzene- $d_6$  at RT.

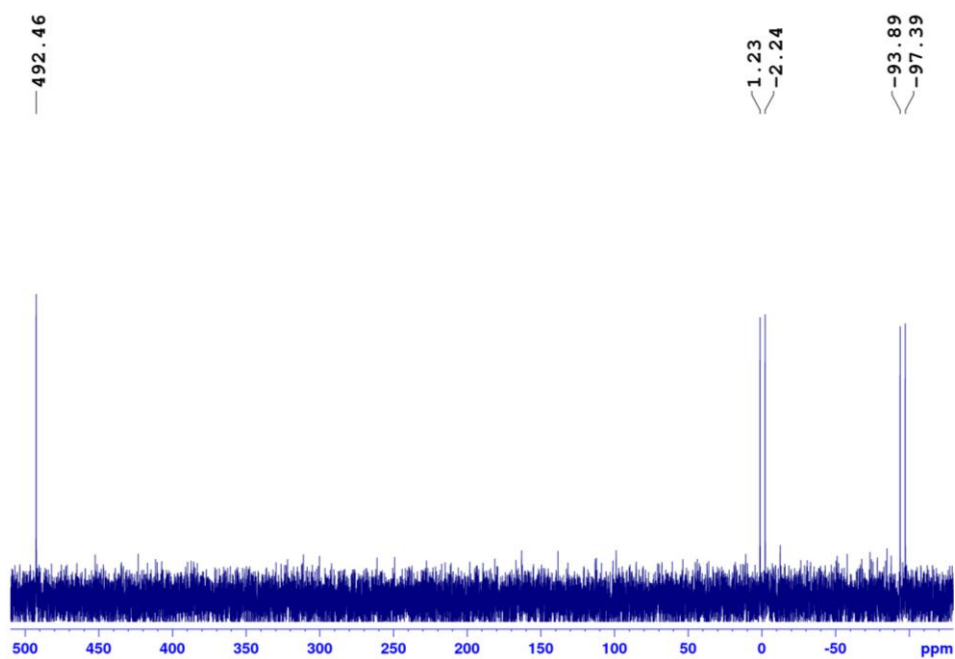

Figure S7  $^{31}\text{P}\{^1\text{H}\}$  NMR spectrum of 1:1 of **1** and **2** in benzene- $d_6$  at RT.

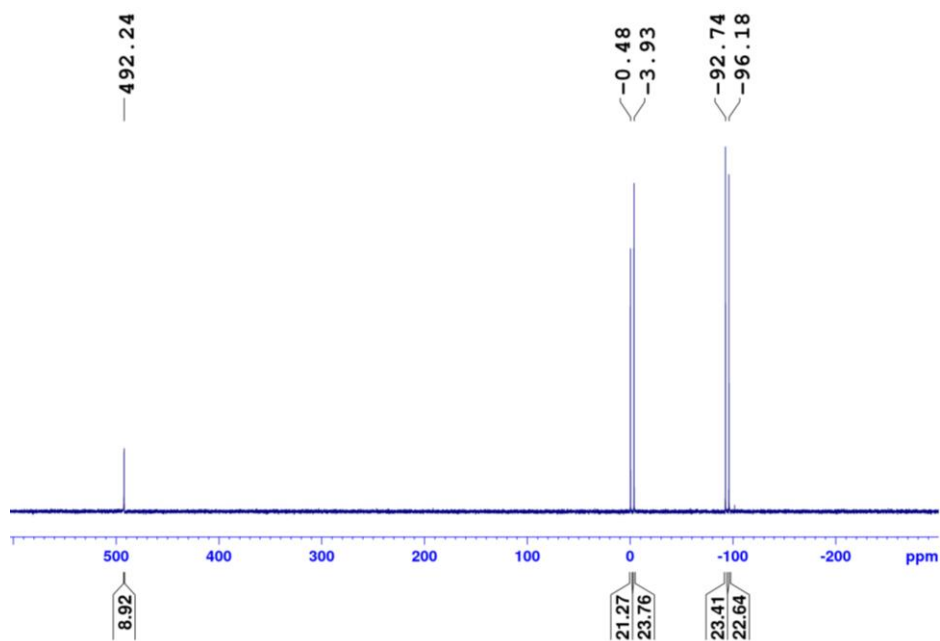

Figure S8  $^{31}\text{P}\{^1\text{H}\}$  NMR spectrum of 1:1 of **1** and **2** in  $\text{THF-}d_8$  at RT.

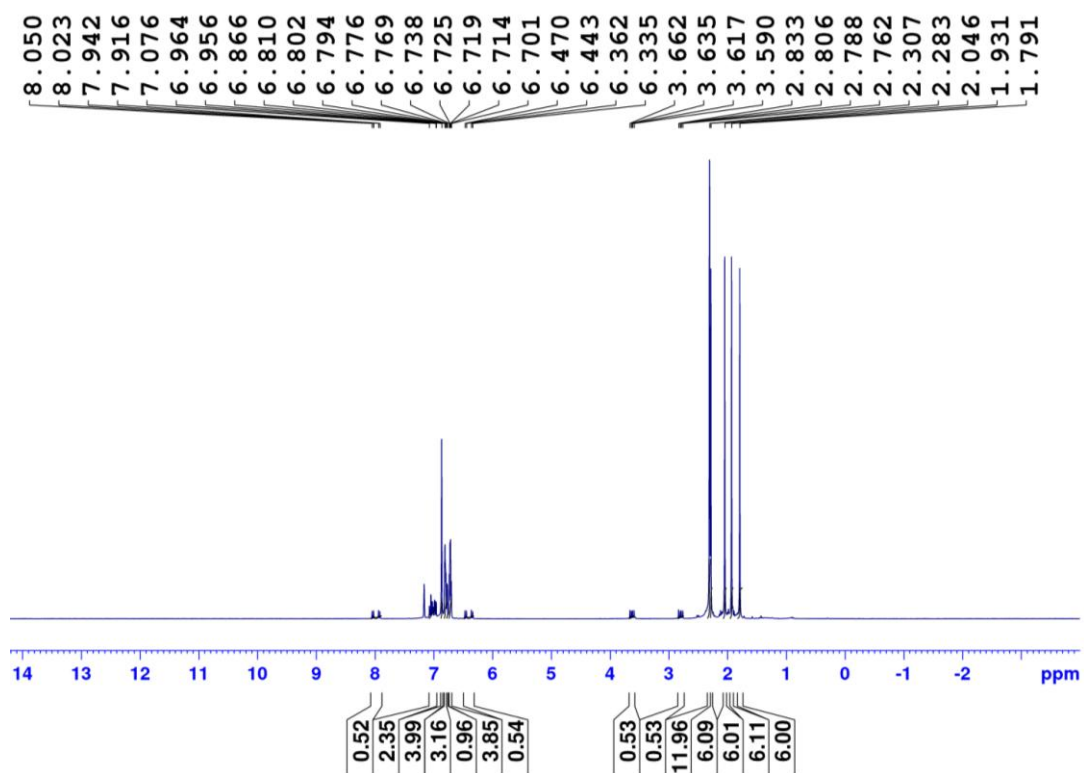

Figure S9  $^1\text{H}$  NMR spectrum of **4** in  $\text{benzene-}d_6$  at RT.

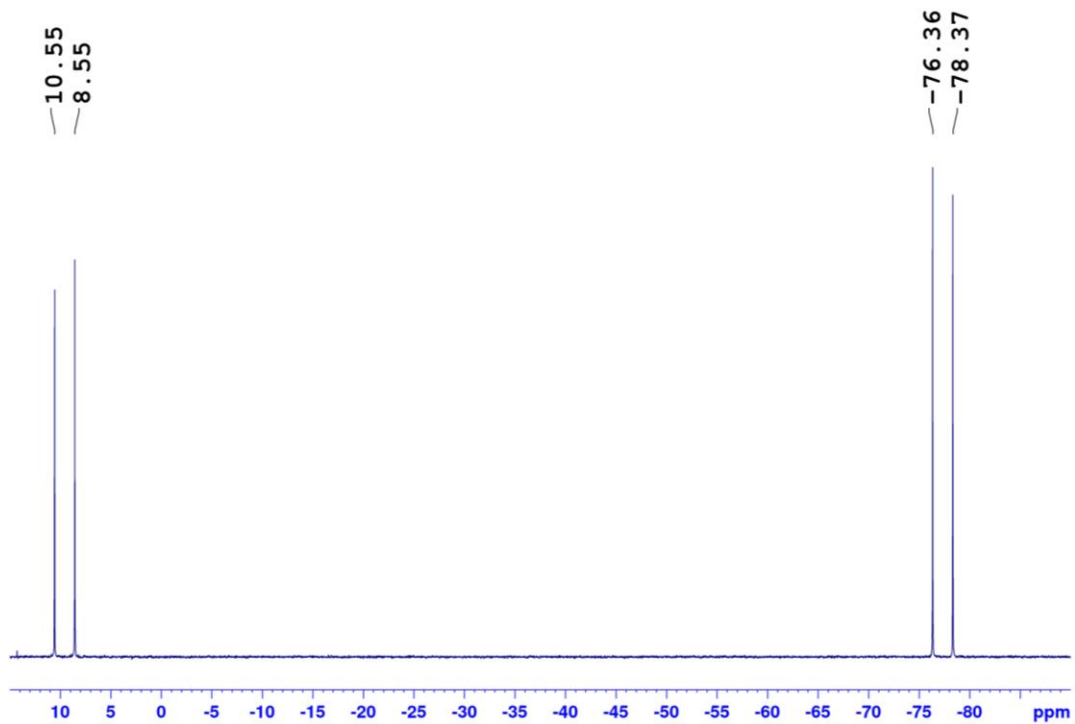

Figure S10  $^{31}\text{P}\{^1\text{H}\}$  NMR spectrum of **4** in benzene- $d_6$  at RT.

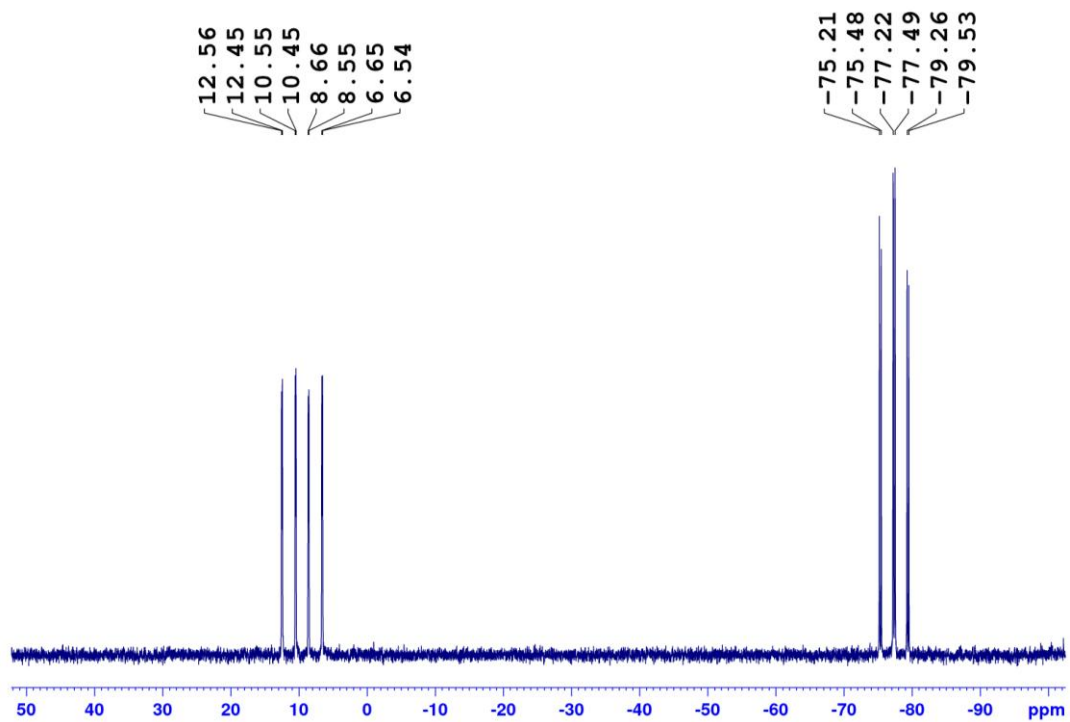

Figure S11  $^{31}\text{P}$  NMR spectrum of **4** in benzene- $d_6$  at RT.

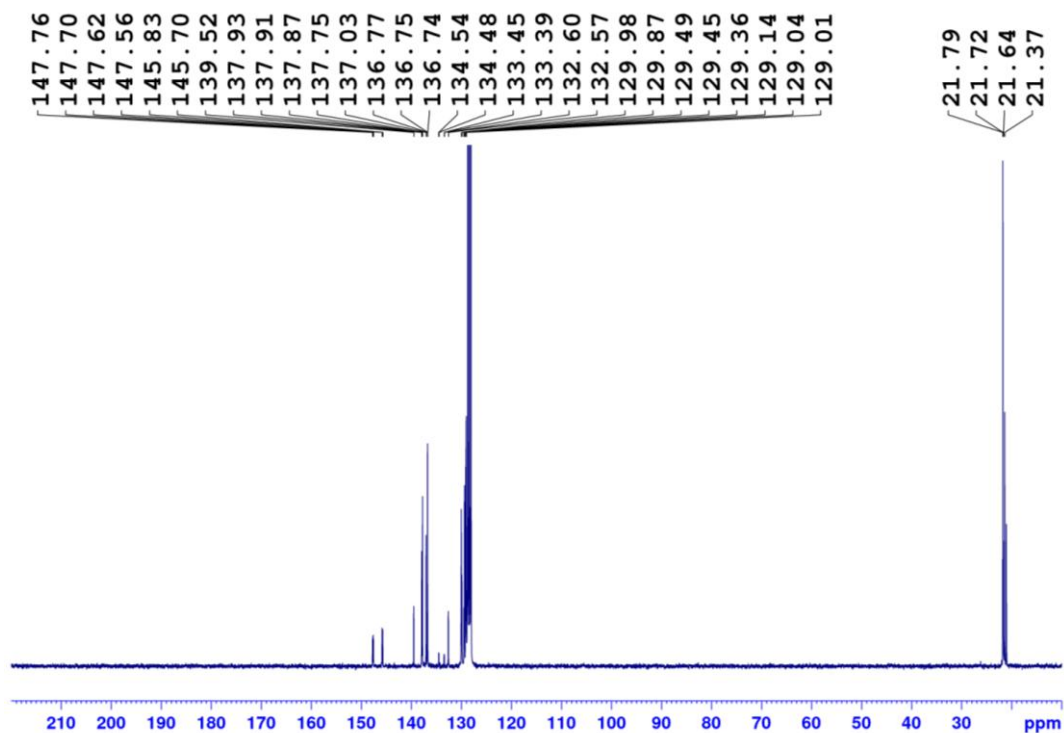

Figure S12  $^{13}\text{C}\{\text{H}\}$  NMR spectrum of **4** in benzene- $d_6$  at RT.

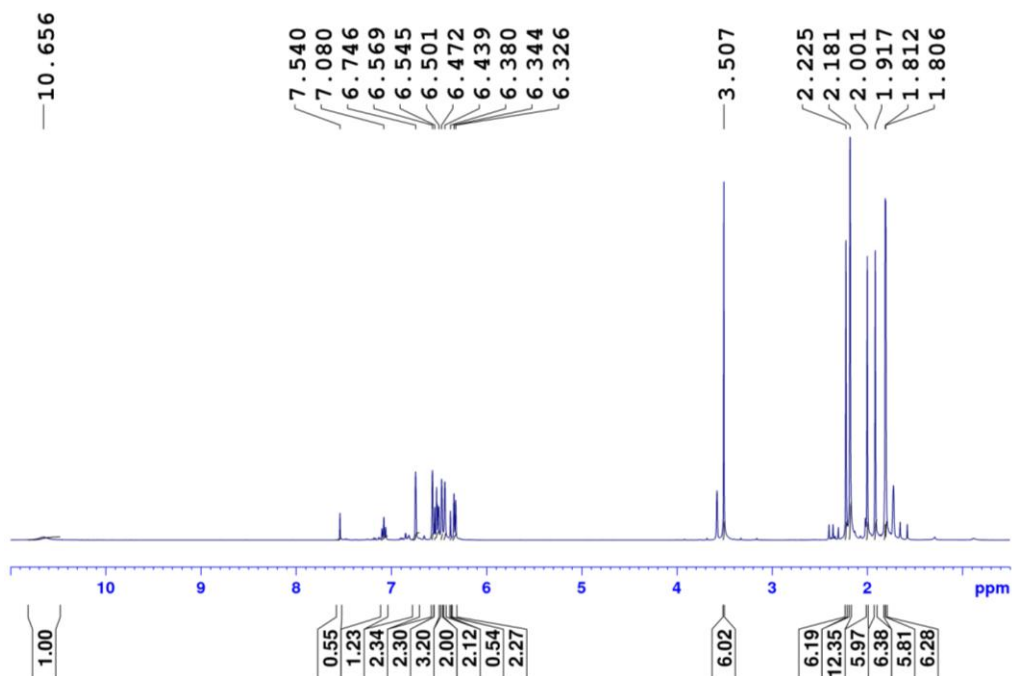

Figure S13  $^1\text{H}$  NMR spectrum of **5** in THF- $d_8$  at RT.



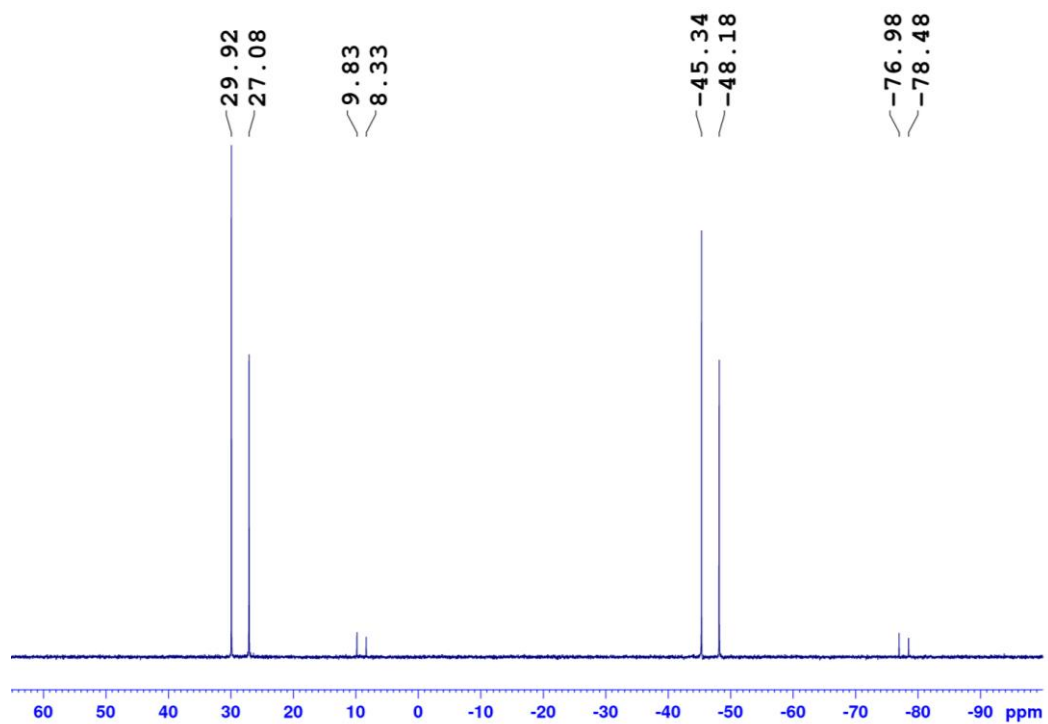

**Figure S14** <sup>31</sup>P{<sup>1</sup>H} NMR spectrum of **5** (with 5% compound **4**) in THF-*d*<sub>8</sub> at RT.

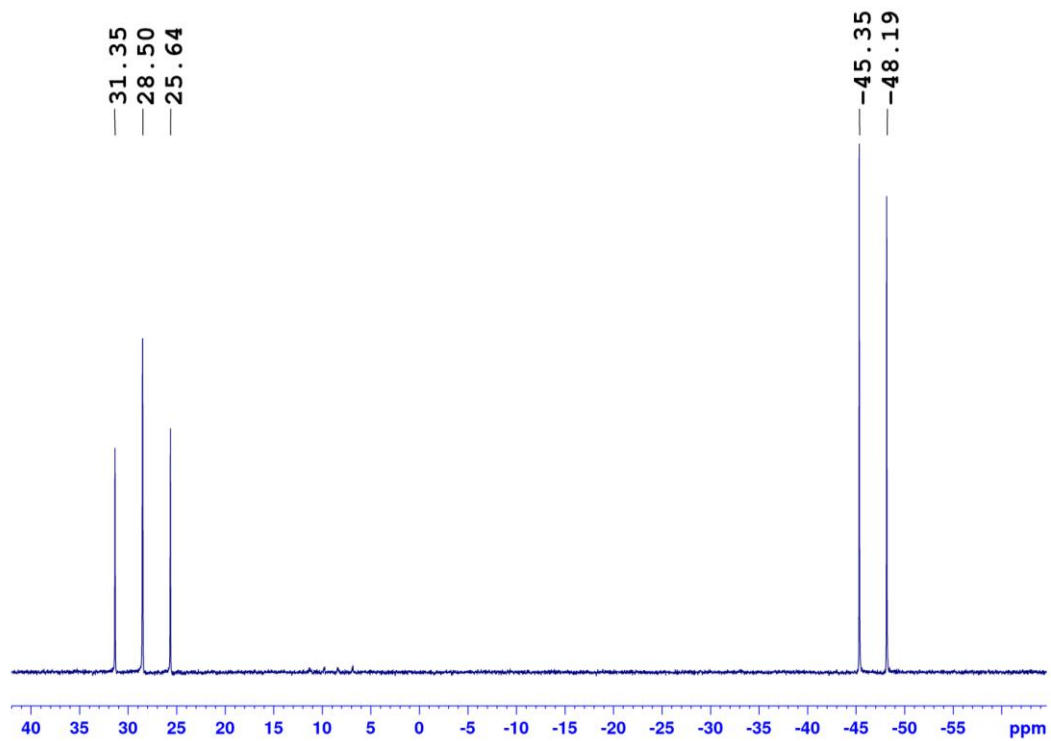

**Figure S15** <sup>31</sup>P NMR spectrum of **5** (with 5% compound **4**) in THF-*d*<sub>8</sub> at RT.

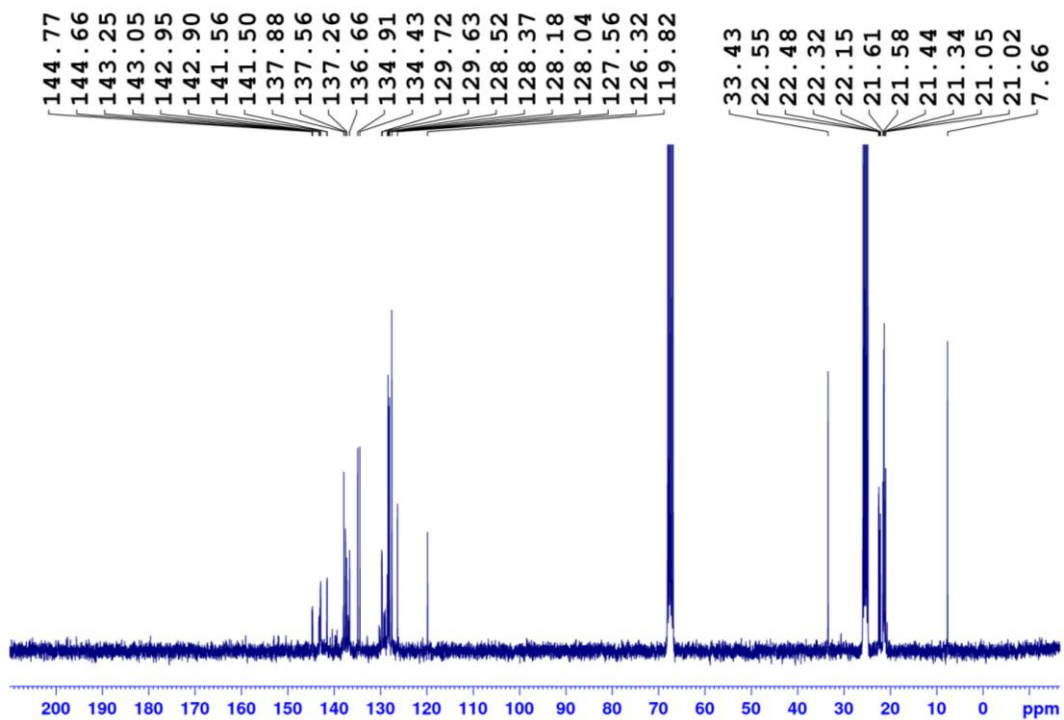

**Figure S16**  $^{13}\text{C}\{^1\text{H}\}$  NMR spectrum of **5** in  $\text{THF-}d_8$  at RT.

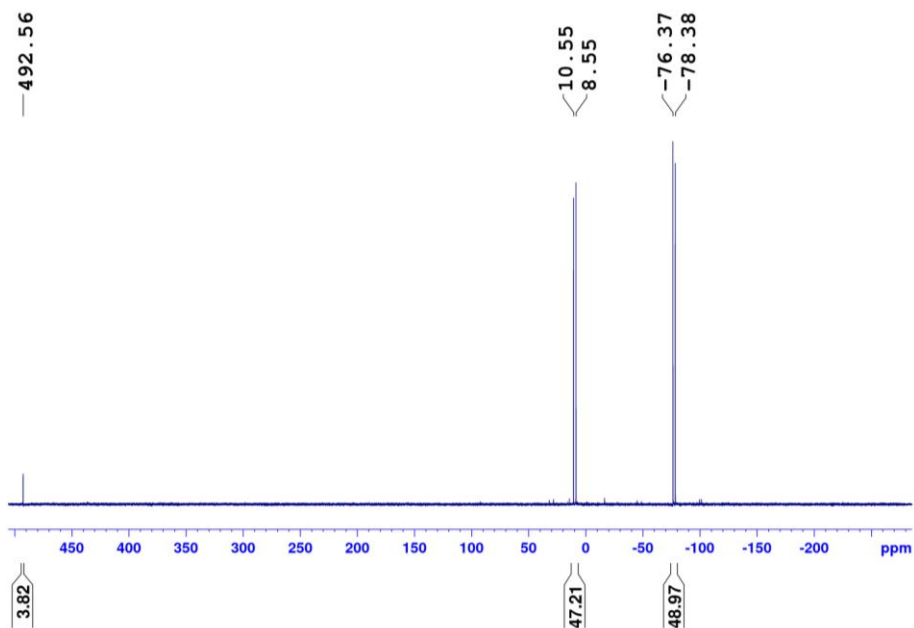

**Figure S17**  $^{31}\text{P}\{^1\text{H}\}$  NMR spectrum from the crude reaction mixture of catalytic hydrolysis of **1** in THF in presence of one drop of  $\text{benzene-}d_6$  at RT.

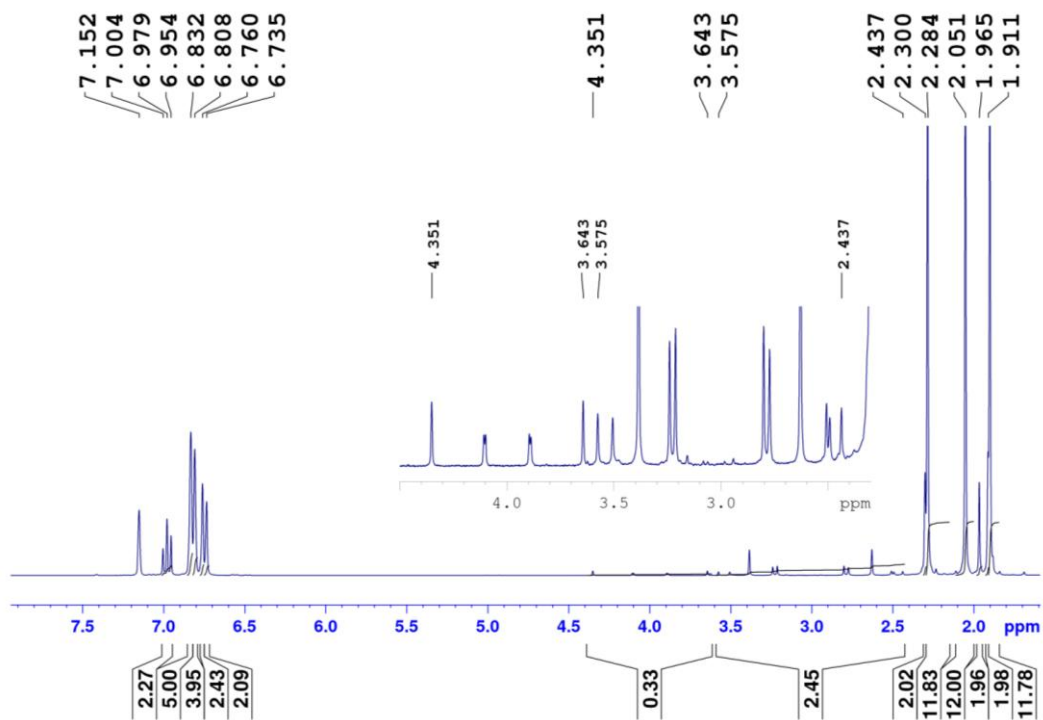

Figure S18  $^1\text{H}$  NMR spectrum of **6** in benzene- $d_6$  at RT.

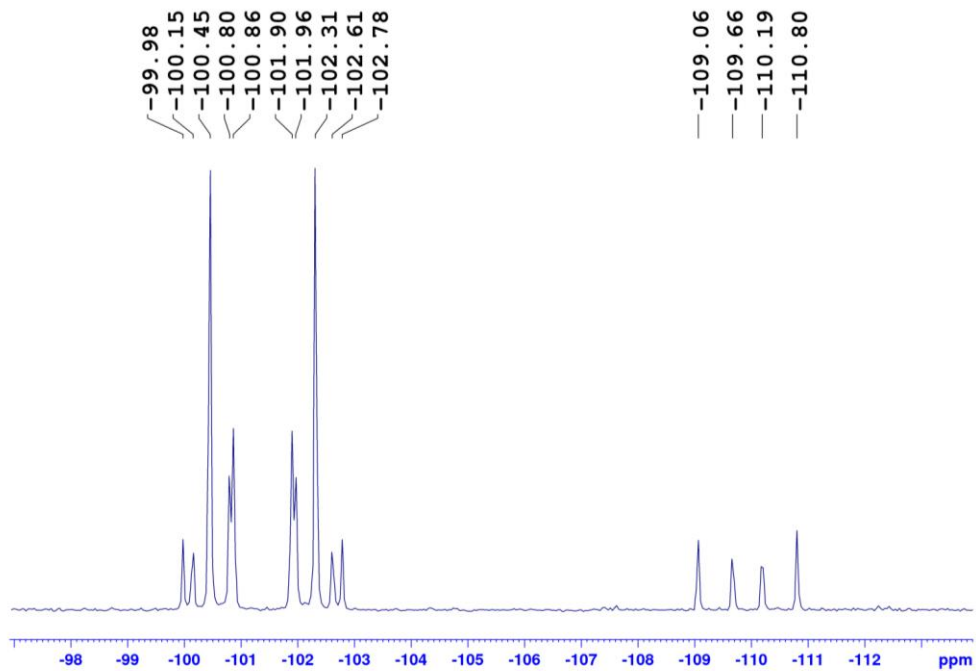

Figure S19  $^{31}\text{P}$  NMR spectrum of **6** in benzene- $d_6$  at RT.

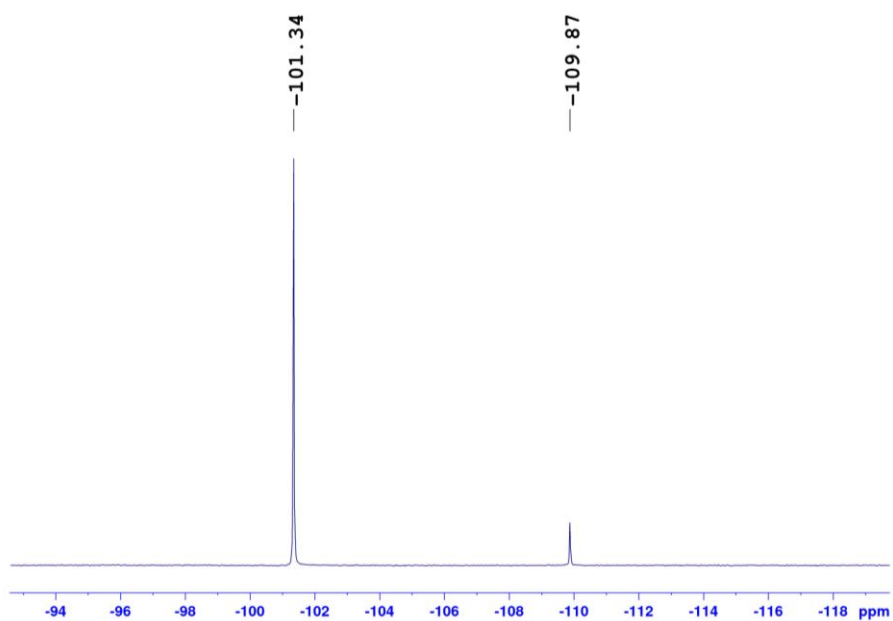

**Figure S20**  $^{31}\text{P}\{\text{H}\}$  NMR spectrum of **6** in benzene- $d_6$  at RT. -50 °C.

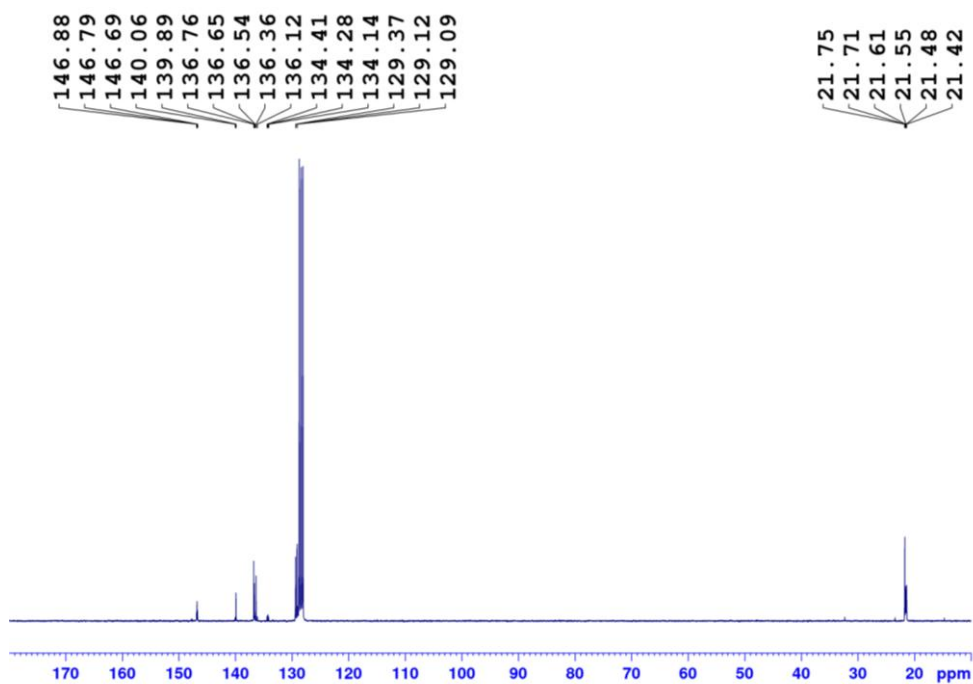

**Figure S21**  $^{13}\text{C}\{\text{H}\}$  NMR spectrum of **6** in benzene- $d_6$  at RT.

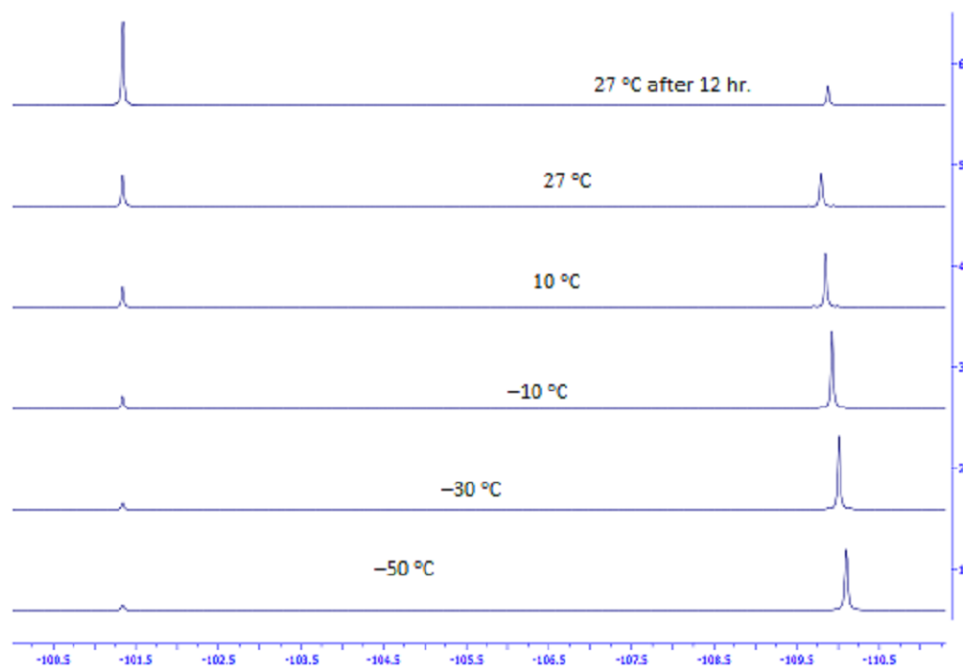

**Figure S22** VT-NMR spectra of **6** in toluene- $d_8$ .

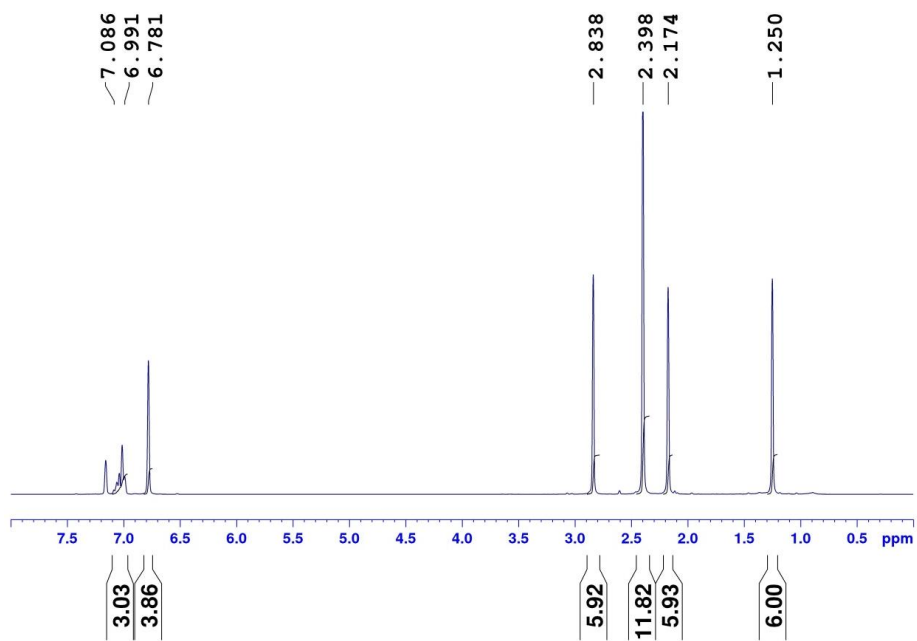

**Figure S23**  $^1\text{H}$  NMR spectrum of **7** in benzene- $d_6$  at RT.

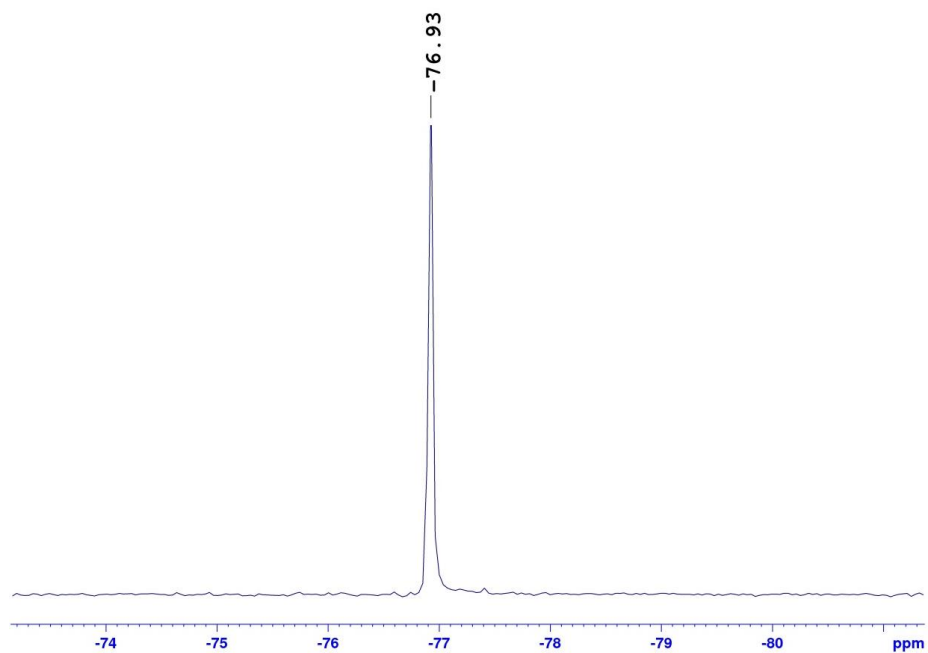

Figure S24 <sup>31</sup>P{<sup>1</sup>H} NMR spectrum of 7 in benzene-*d*<sub>6</sub> at RT.

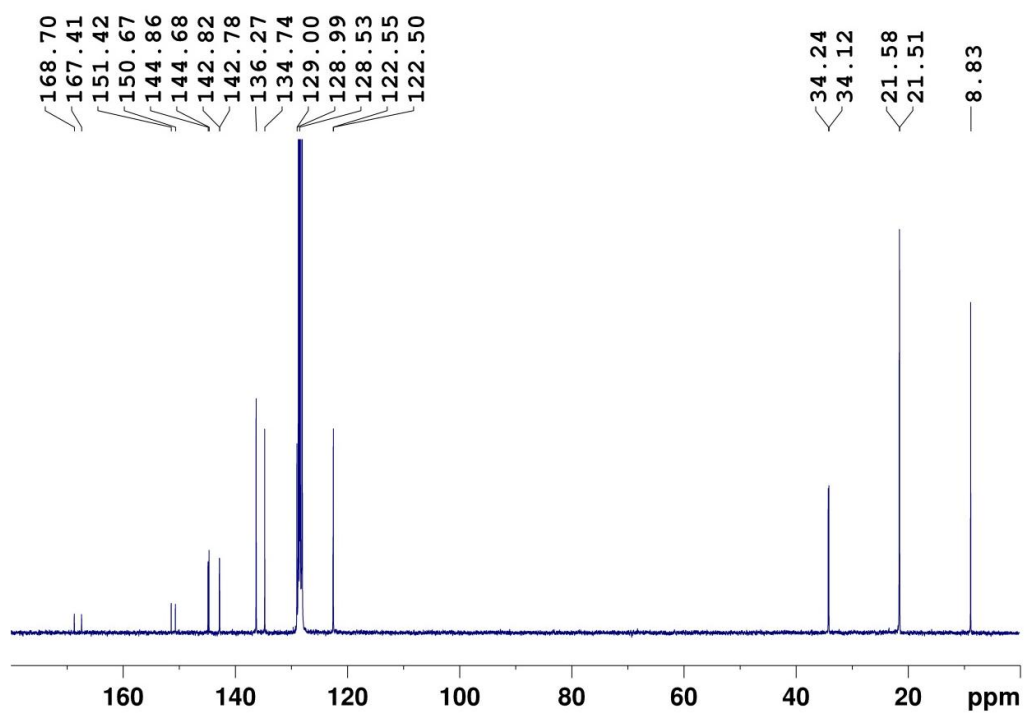

Figure S25 <sup>13</sup>C{<sup>1</sup>H} NMR spectrum of 7 in benzene-*d*<sub>6</sub> at RT.

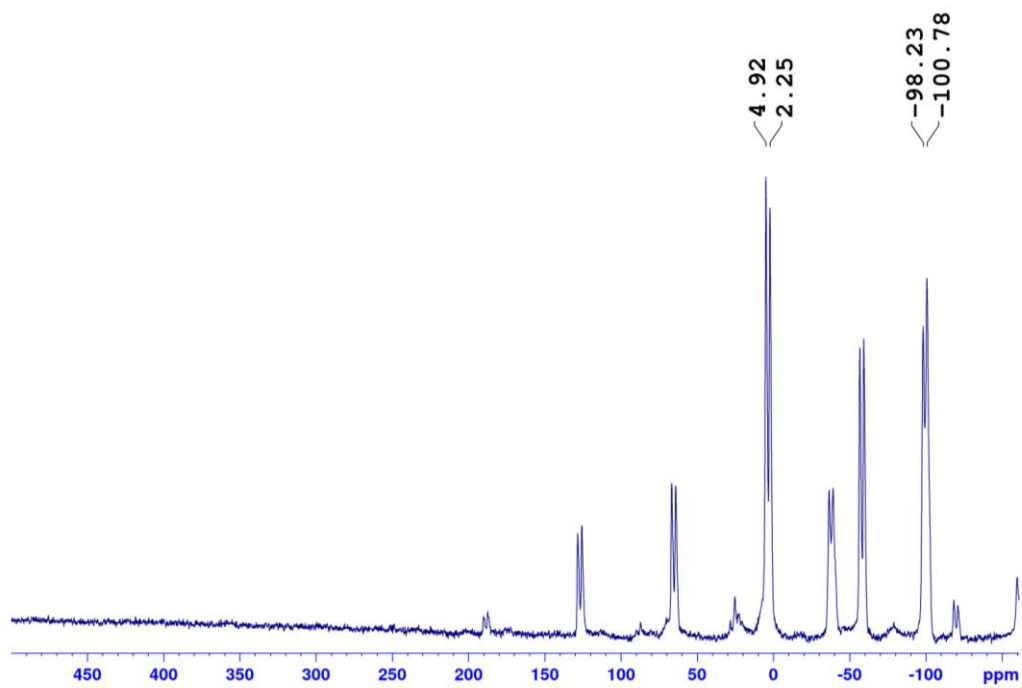

Figure S26 CP-MAS  $^{31}\text{P}\{^1\text{H}\}$  NMR spectrum of **3** at RT.

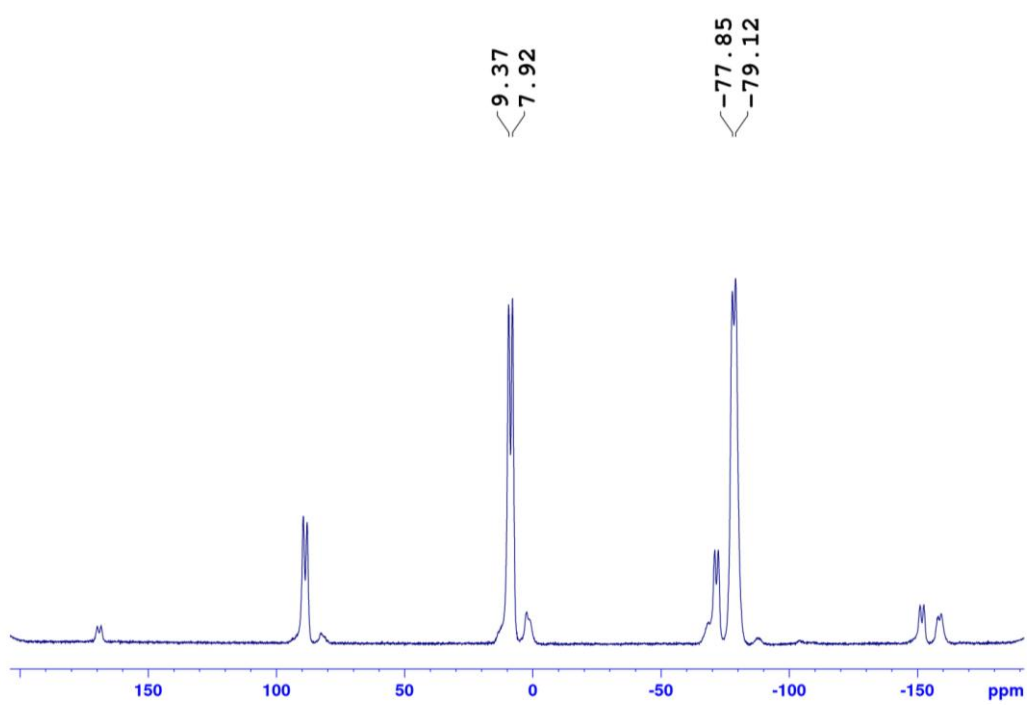

Figure S27 CP-MAS  $^{31}\text{P}\{^1\text{H}\}$  NMR spectrum of **4** at RT.

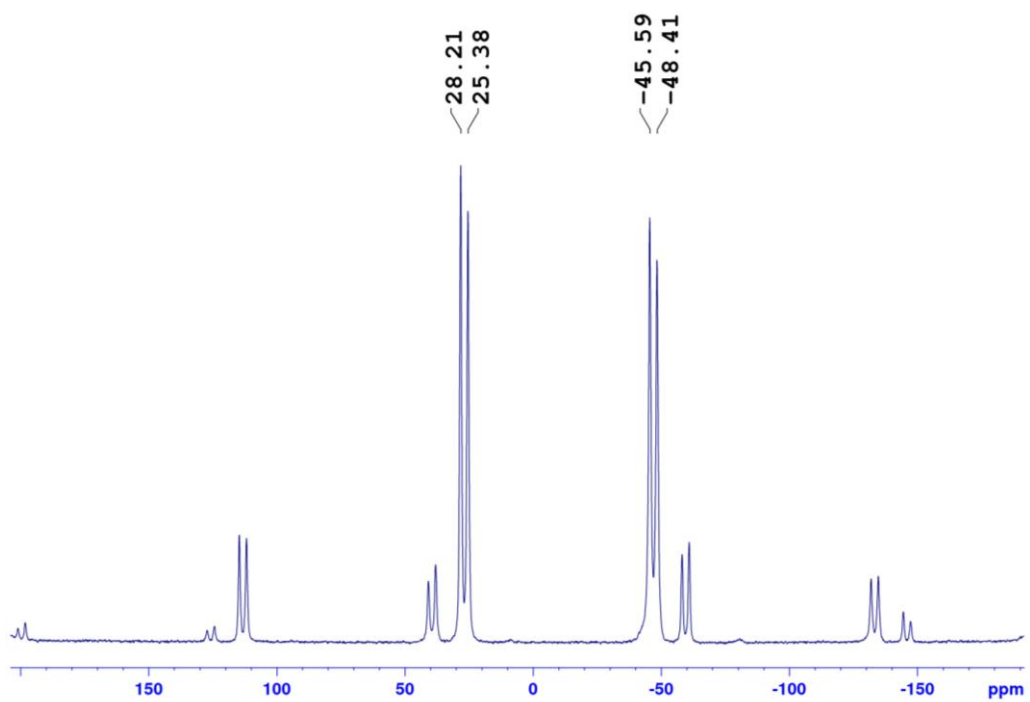

Figure S28 CP-MAS  $^{31}\text{P}\{^1\text{H}\}$  NMR spectrum of **5** at RT.

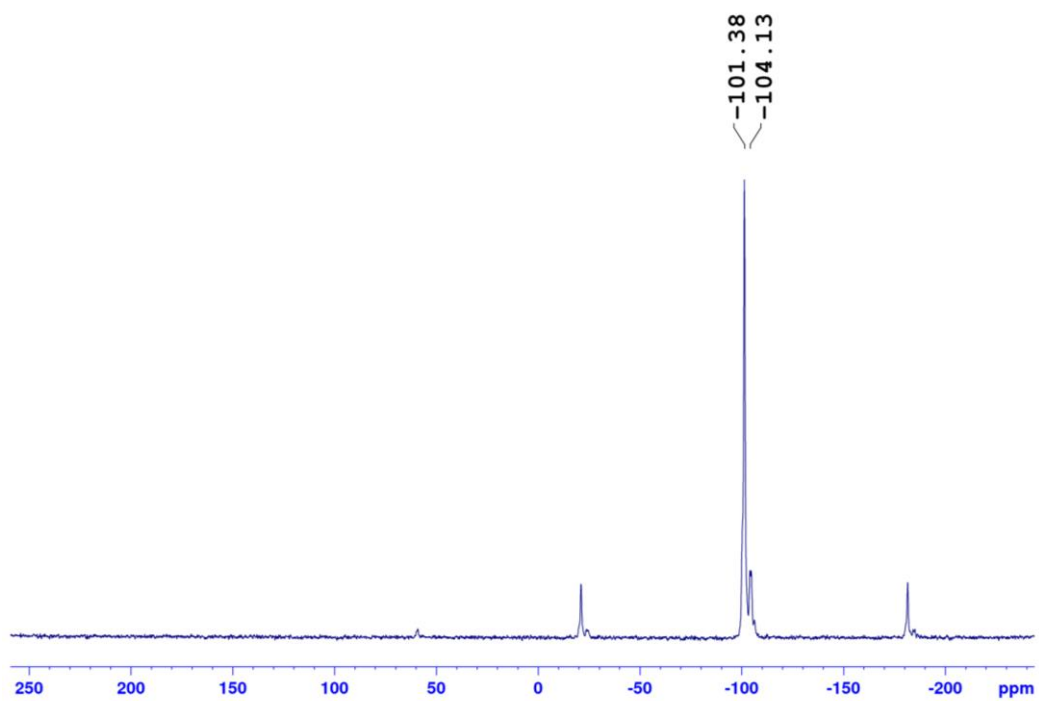

Figure S29 CP-MAS  $^{31}\text{P}\{^1\text{H}\}$  NMR spectrum of **6** at RT.



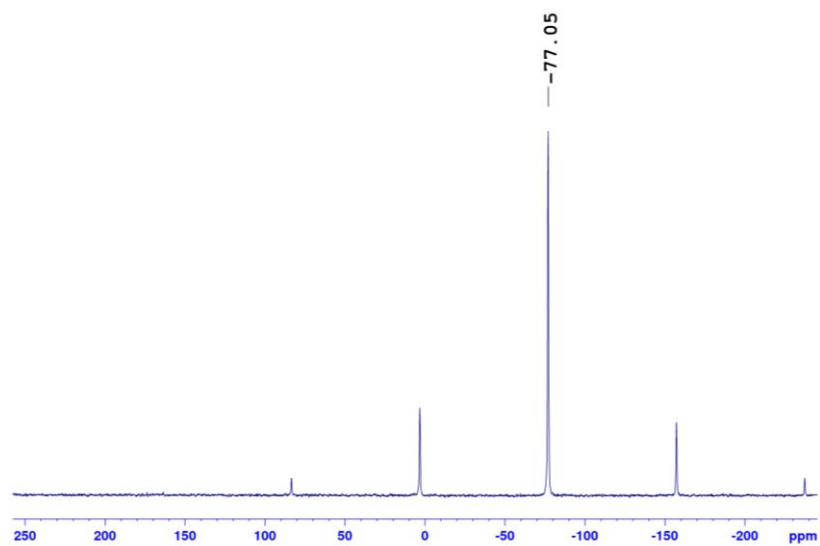

**Figure S30** CP-MAS  $^{31}\text{P}\{^1\text{H}\}$  NMR spectrum of **7** at RT.

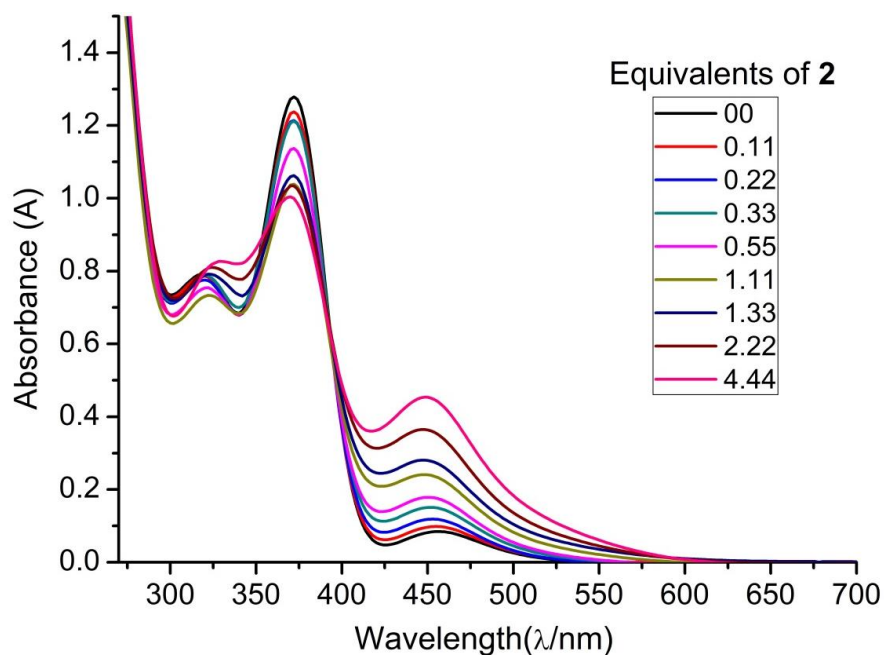

**Figure S31** UV/vis spectra of **1**(black line) in THF with increasing concentrations of **2**. There is clear isosbestic point at 392 nm. The absorbance at 448 nm is increasing while absorbance at 372 nm is decreasing when equilibrium shifted towards **3**.

**Table S2** Concentrations and absorbance for the UV/vis titration of **1** with **2**.

A series of solutions with the following concentrations of **1** and **2** were prepared. UV/vis spectra were recorded in THF at 298 K and the absorption maxima at 372 and 448 nm were noted.

| [1]/mM | [2]/mM | Equivalents of 2 | Absorbance at $\lambda_{\max} = 448$ nm | Absorbance at $\lambda_{\max} = 372$ nm |
|--------|--------|------------------|-----------------------------------------|-----------------------------------------|
| 1.0885 | 00     | 0                | 0.07986                                 | 1.27887                                 |
| 1.0885 | 0.1208 | 0.11             | 0.09496                                 | 1.23762                                 |
| 1.0885 | 0.2416 | 0.22             | 0.11675                                 | 1.21381                                 |
| 1.0885 | 0.3624 | 0.33             | 0.14963                                 | 1.21213                                 |
| 1.0885 | 0.6039 | 0.55             | 0.17802                                 | 1.13718                                 |
| 1.0885 | 1.2079 | 1.11             | 0.24104                                 | 1.03872                                 |
| 1.0885 | 1.4495 | 1.33             | 0.28081                                 | 1.06244                                 |
| 1.0885 | 1.9327 | 1.77             | 0.2989                                  | 1.06942                                 |
| 1.0885 | 2.4158 | 2.22             | 0.36518                                 | 1.03378                                 |
| 1.0885 | 2.8990 | 2.66             | 0.40283                                 | 1.05193                                 |
| 1.0885 | 3.3822 | 3.10             | 0.45361                                 | 1.04477                                 |
| 1.0885 | 3.8653 | 3.55             | 0.44189                                 | 1.04033                                 |
| 1.0885 | 4.8317 | 4.44             | 0.45351                                 | 0.99947                                 |

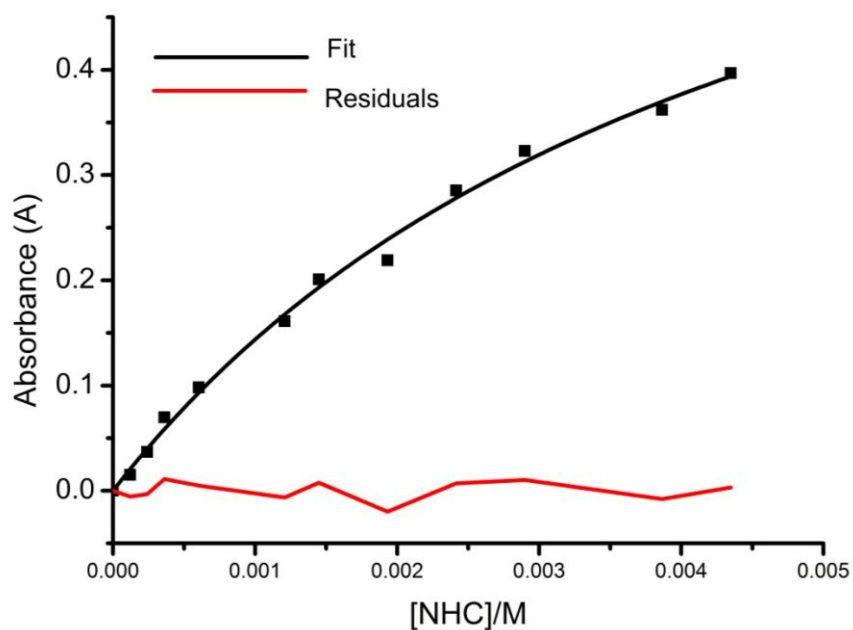

**Figure S32** Concentration of **2** vs absorbance at 448 nm with fixed concentration of **1**.

The resulting curve was fitted according to the equation describe by Aldrich-Wright.<sup>S1</sup> From the fitting process it is shown that the equilibrium constant  $K$  was  $214.58 \text{ M}^{-1}$  at 298 K which corresponds to  $\Delta G_{298} = -13.30 \text{ KJmol}^{-1}$ .

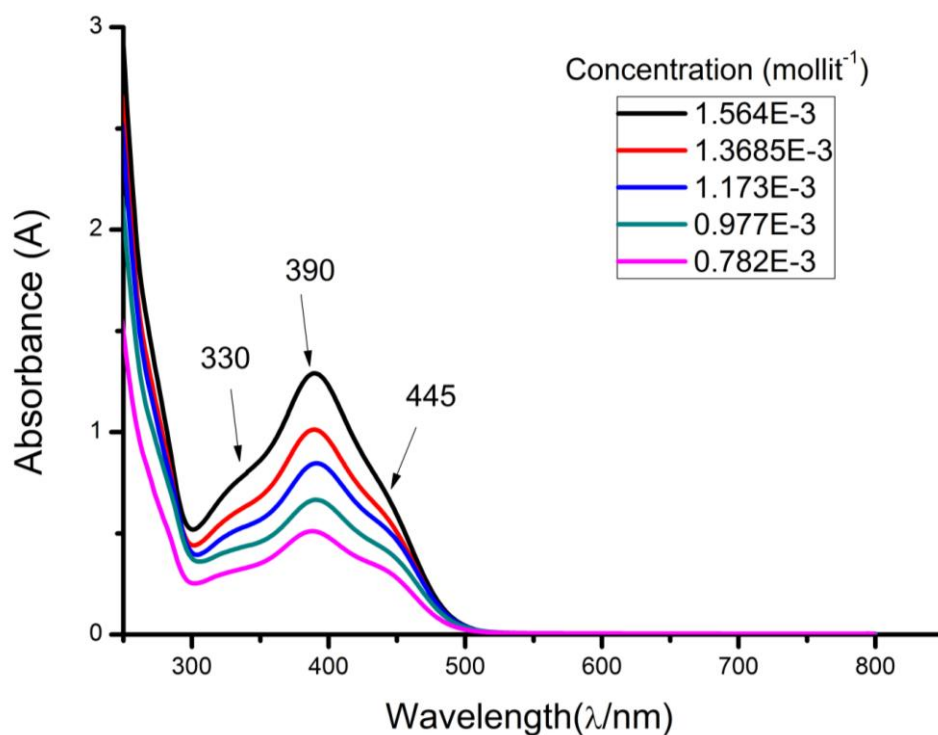

**Figure S33** UV/vis spectrum of compound **5**.

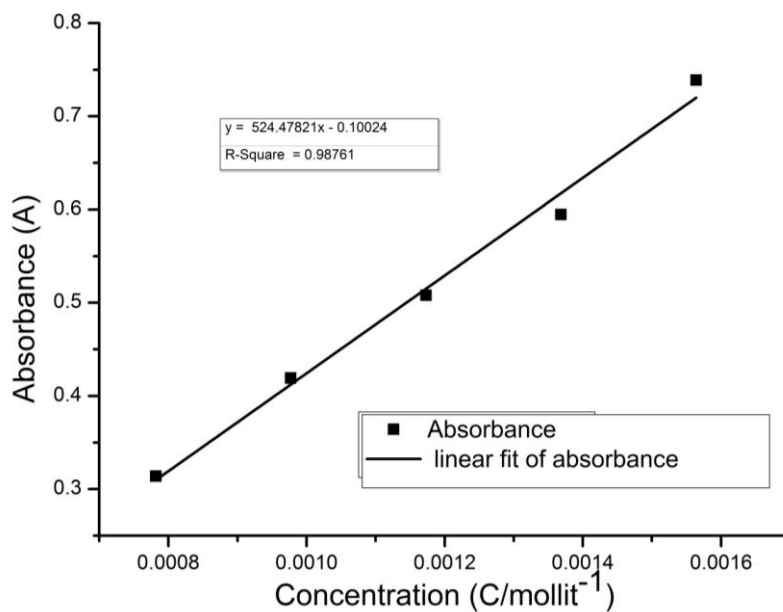

Figure S34 Linear regression of 5 at 330 nm.

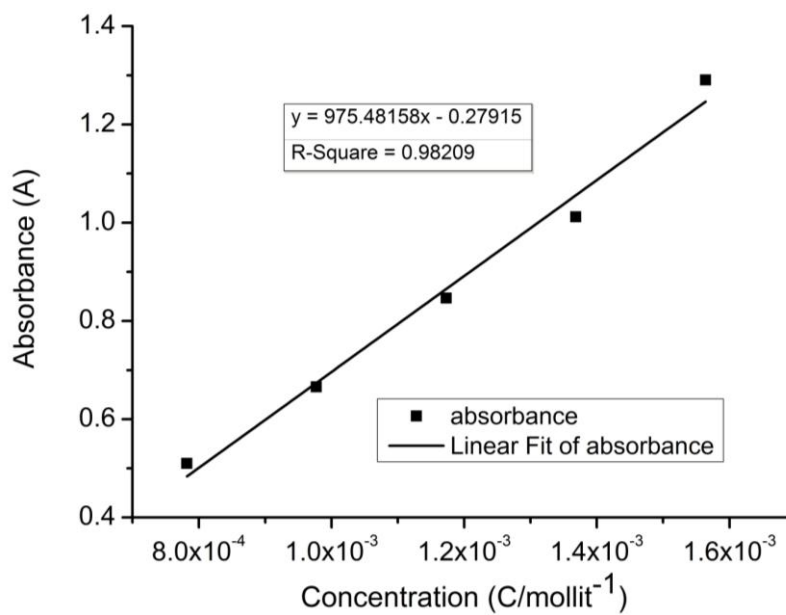

Figure S35 Linear regression of 5 at 390 nm.

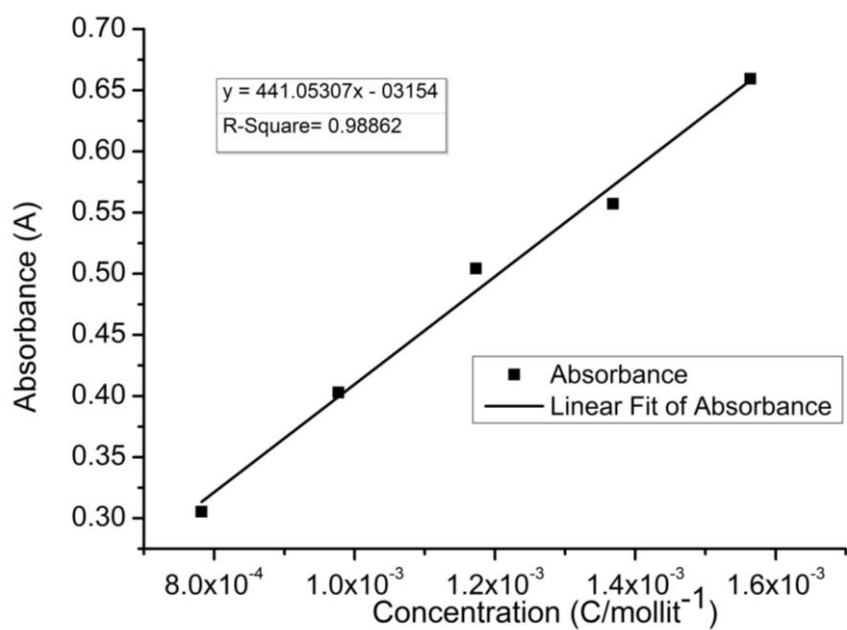

Figure S36 Linear regression of 5 at 445 nm.

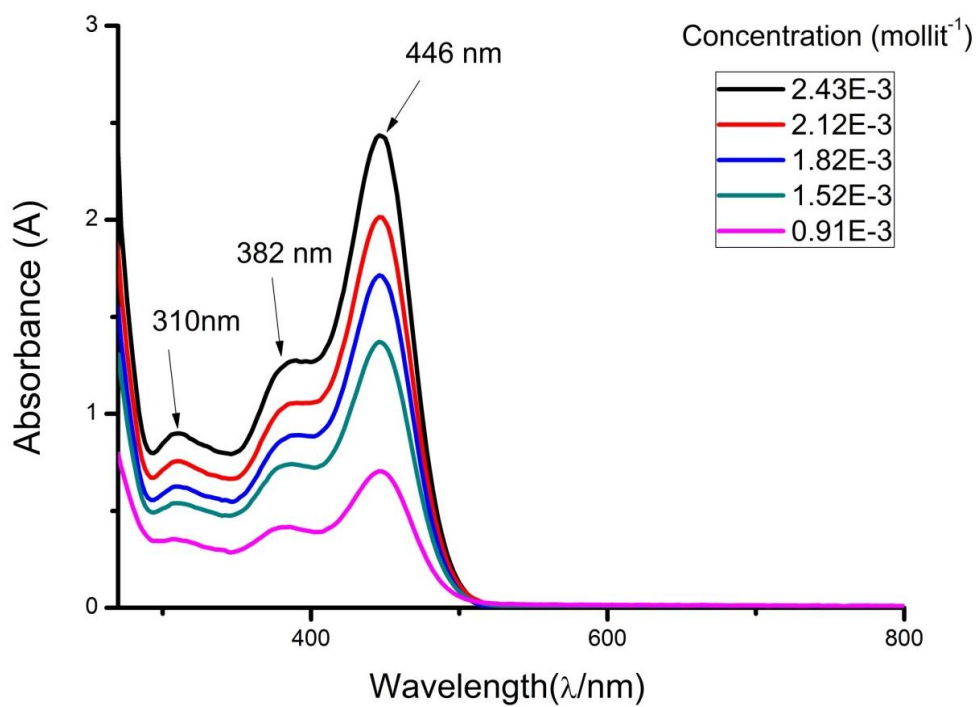

Figure S37 UV/Vis spectrum of compound 7 in THF.

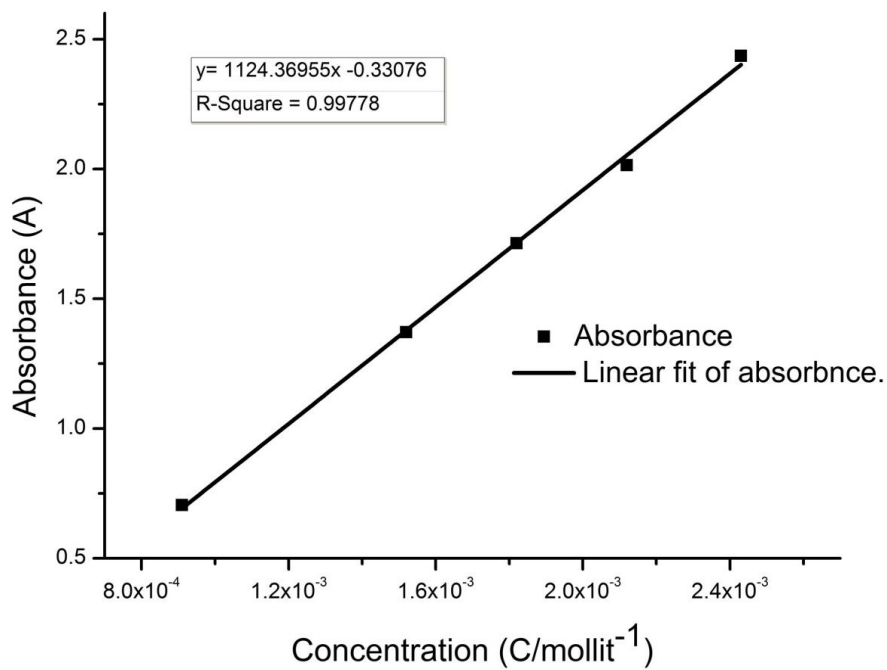

Figure S38 Linear regression of compound 7 at 446 nm.

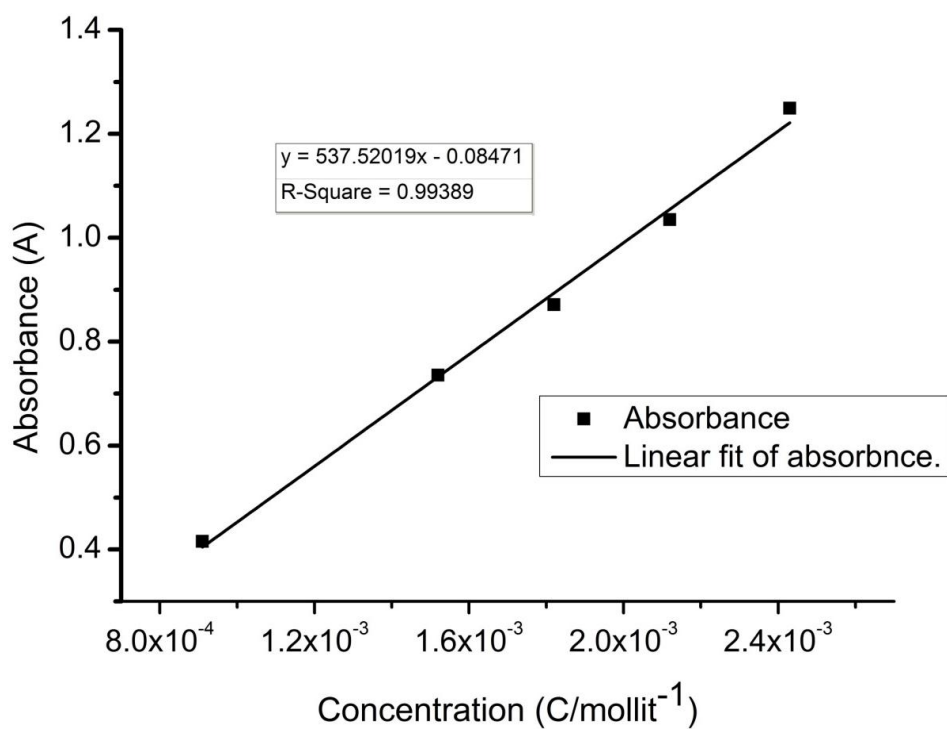

Figure S39 Linear regression of compound 7 at 382 nm.

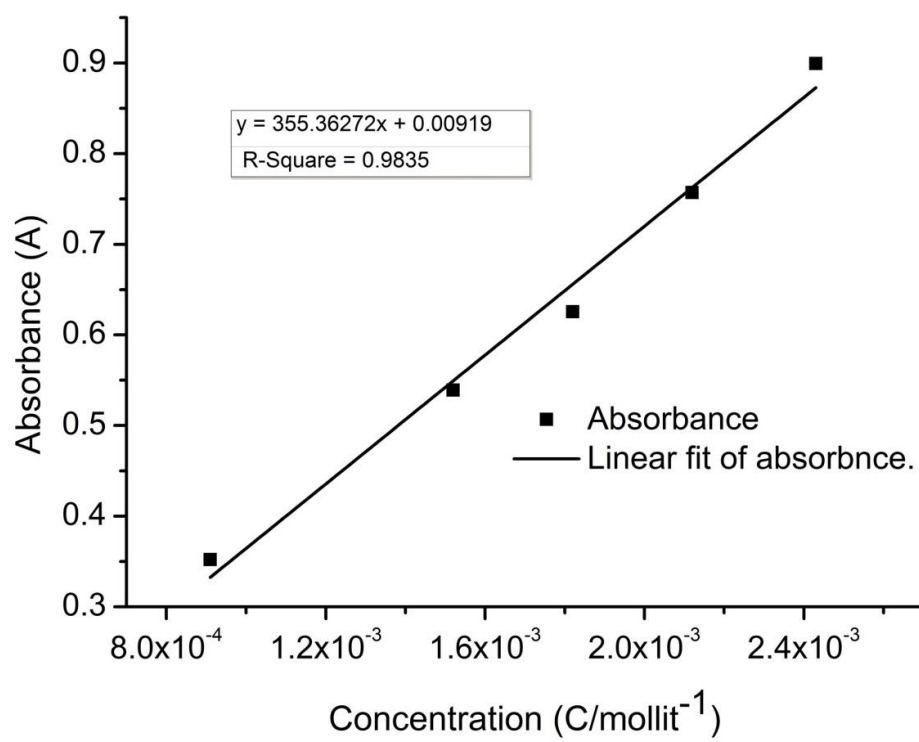

**Figure S40** Linear regression of compound 7 at 310 nm.

## NMR Simulation

Simulated NMR spectra of **6** for the AA'XX' spin system were calculated using SIMPSON 4.2.1<sup>S2</sup> using a 4-spin system (two <sup>1</sup>H atoms and two <sup>31</sup>P atoms) and acquisition parameters (spectral width and acquisition time) same as that used for the experiment. Simulated spectra were processed using NmrGlue<sup>S3</sup> and plotted using Matplotlib 2.0.2 in Python 3.6. The same chemical shift was used for the two <sup>31</sup>P as well as the <sup>1</sup>H atoms. The pairwise *J*-couplings between the atoms (<sup>1</sup>*J*<sub>(<sup>31</sup>P, <sup>31</sup>P)</sub>, <sup>3</sup>*J*<sub>(<sup>1</sup>H, <sup>1</sup>H)</sub>, <sup>1</sup>*J*<sub>(<sup>31</sup>P, <sup>1</sup>H)</sub>, <sup>2</sup>*J*<sub>(<sup>31</sup>P, <sup>1</sup>H)</sub>) were varied around the values calculated based on the known dependence of the splitting pattern on the values of these couplings. The values that fit both the multiplet pattern and the intensities are reported along with the simulated spectra in Figures S41 and S42.

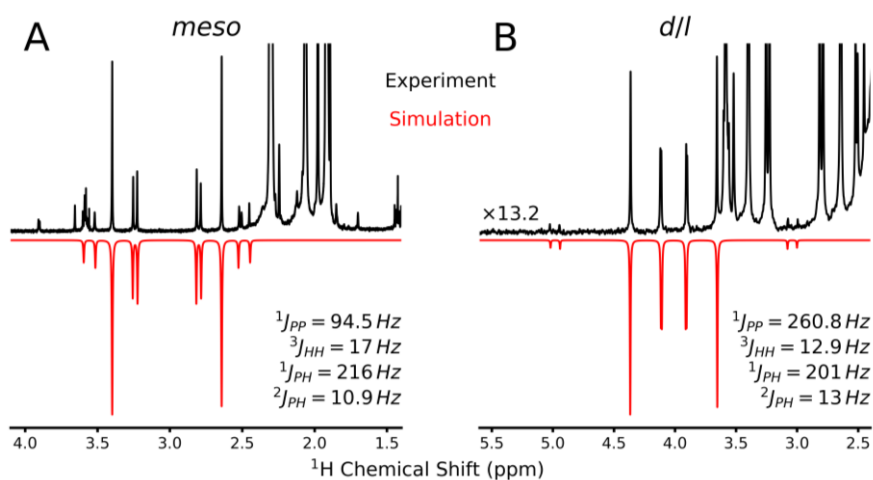

**Figure S41** Comparison between the experimental (black, upper curve) and simulated (red, lower curve) <sup>1</sup>H NMR spectrum for the *meso* (A) and the *dl* (B) compounds. The scalar couplings used for the simulations are shown at the lower right.

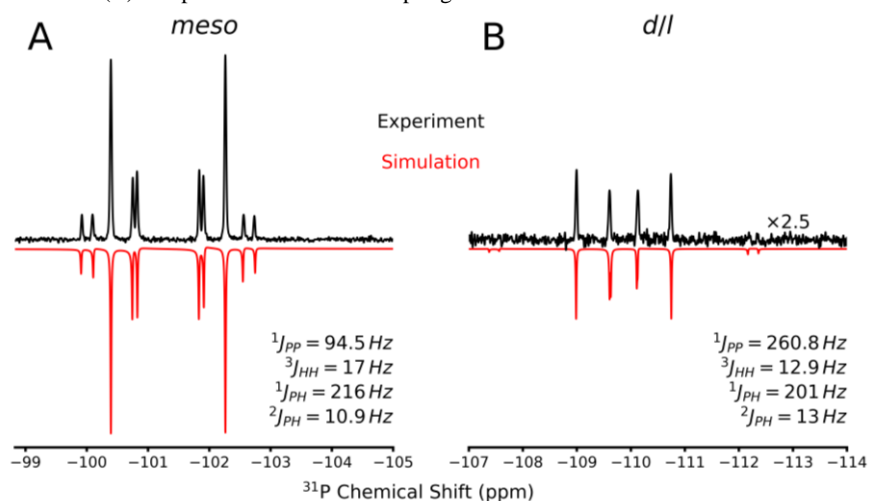

**Figure S42** Comparison between the experimental (black, upper curve) and simulated (red, lower, inverted curve) <sup>31</sup>P NMR spectrum for the *meso* (A) and the *dl* (B) compounds. The scalar couplings used for the simulations are shown at the lower right.



## Crystallographic Details

Single crystal X-ray data of **3**, **5-7** were collected at 100 K and **4** collected at 151 K on a Bruker SMART APEX2 CCD diffractometer using graphite-monochromated Mo K $\alpha$  radiation ( $\lambda = 0.71069$  Å). The linear absorption coefficients, scattering factors for the atoms, and the anomalous dispersion corrections were taken from International Tables for X-ray Crystallography.<sup>S4</sup> Data integration and reduction were processed with SAINT software.<sup>S5</sup> An empirical absorption correction was applied to the collected reflections with SADABS.<sup>S6</sup> The structure was solved by direct methods using SHELXT<sup>S7</sup> and refined by full matrix least-squares method based on F<sup>2</sup> using SHELXL-2016<sup>S7</sup> via the Olex-2 software.<sup>S8</sup> All non-hydrogen-atoms were refined with anisotropic displacement parameters. Hydrogens were fixed in their ideal geometries, and their contributions included in the refinement. The program Diamond 3.2k version is used for the creating crystallographic figures.<sup>S9</sup>

**Table S3** Crystal data and structure refinement for compound **3** (CCDC: 1588456)

|                                             |                                                               |
|---------------------------------------------|---------------------------------------------------------------|
| Identification code                         | VC_AJ_180617                                                  |
| Empirical formula                           | C <sub>55</sub> H <sub>62</sub> N <sub>2</sub> P <sub>2</sub> |
| Formula weight                              | 813.00                                                        |
| Temperature/K                               | 100(2)                                                        |
| Crystal system                              | monoclinic                                                    |
| Space group                                 | P2 <sub>1</sub> /n                                            |
| a/Å                                         | 10.9502(8)                                                    |
| b/Å                                         | 20.9614(14)                                                   |
| c/Å                                         | 20.7528(17)                                                   |
| $\alpha$ /°                                 | 90                                                            |
| $\beta$ /°                                  | 97.766(6)                                                     |
| $\gamma$ /°                                 | 90                                                            |
| Volume/Å <sup>3</sup>                       | 4719.7(6)                                                     |
| Z                                           | 4                                                             |
| $\rho_{\text{calc}}$ /cm <sup>3</sup>       | 1.144                                                         |
| $\mu$ /mm <sup>-1</sup>                     | 0.130                                                         |
| F(000)                                      | 1744.0                                                        |
| Crystal size/mm <sup>3</sup>                | 0.2 × 0.18 × 0.16                                             |
| Radiation                                   | MoK $\alpha$ ( $\lambda = 0.71073$ )                          |
| 2 $\theta$ range for data collection/°      | 2.774 to 51.344                                               |
| Index ranges                                | -13 ≤ h ≤ 13, -25 ≤ k ≤ 25, -25 ≤ l ≤ 24                      |
| Reflections collected                       | 58867                                                         |
| Independent reflections                     | 8812 [R <sub>int</sub> = 0.2318, R <sub>sigma</sub> = 0.1292] |
| Data/restraints/parameters                  | 8812/0/548                                                    |
| Goodness-of-fit on F <sup>2</sup>           | 1.020                                                         |
| Final R indexes [I ≥ 2 $\sigma$ (I)]        | R <sub>1</sub> = 0.1019, wR <sub>2</sub> = 0.2455             |
| Final R indexes [all data]                  | R <sub>1</sub> = 0.1815, wR <sub>2</sub> = 0.3108             |
| Largest diff. peak/hole / e Å <sup>-3</sup> | 0.56/-0.42                                                    |

**Table S4** Crystal data and structure refinement for compound **4** (CCDC: 1588457)

|                                             |                                                               |
|---------------------------------------------|---------------------------------------------------------------|
| Identification code                         | sh3914                                                        |
| Empirical formula                           | C <sub>48</sub> H <sub>52</sub> OP <sub>2</sub>               |
| Formula weight                              | 706.83                                                        |
| Temperature/K                               | 151.25                                                        |
| Crystal system                              | orthorhombic                                                  |
| Space group                                 | Pbca                                                          |
| a/Å                                         | 16.9466(7)                                                    |
| b/Å                                         | 20.6986(9)                                                    |
| c/Å                                         | 23.0289(10)                                                   |
| α/°                                         | 90                                                            |
| β/°                                         | 90                                                            |
| γ/°                                         | 90                                                            |
| Volume/Å <sup>3</sup>                       | 8077.9(6)                                                     |
| Z                                           | 8                                                             |
| ρ <sub>calc</sub> /cm <sup>3</sup>          | 1.162                                                         |
| μ/mm <sup>-1</sup>                          | 0.142                                                         |
| F(000)                                      | 3024.0                                                        |
| Crystal size/mm <sup>3</sup>                | 0.442 × 0.27 × 0.154                                          |
| Radiation                                   | MoKα (λ = 0.71073)                                            |
| 2θ range for data collection/°              | 3.538 to 55.948                                               |
| Index ranges                                | -22 ≤ h ≤ 21, -26 ≤ k ≤ 27, -30 ≤ l ≤ 27                      |
| Reflections collected                       | 139724                                                        |
| Independent reflections                     | 9733 [R <sub>int</sub> = 0.0620, R <sub>sigma</sub> = 0.0284] |
| Data/restraints/parameters                  | 9733/0/480                                                    |
| Goodness-of-fit on F <sup>2</sup>           | 1.025                                                         |
| Final R indexes [I ≥ 2σ (I)]                | R <sub>1</sub> = 0.0616, wR <sub>2</sub> = 0.1624             |
| Final R indexes [all data]                  | R <sub>1</sub> = 0.0822, wR <sub>2</sub> = 0.1791             |
| Largest diff. peak/hole / e Å <sup>-3</sup> | 0.94/-0.55                                                    |

**Table S5** Crystal data and structure refinement for compound **5** (CCDC: 1588458)

|                                             |                                                                |
|---------------------------------------------|----------------------------------------------------------------|
| Identification code                         | VC_AJ_SLNF                                                     |
| Empirical formula                           | C <sub>55</sub> H <sub>64</sub> N <sub>2</sub> OP <sub>2</sub> |
| Formula weight                              | 831.02                                                         |
| Temperature/K                               | 100(2)                                                         |
| Crystal system                              | monoclinic                                                     |
| Space group                                 | P2 <sub>1</sub> /n                                             |
| a/Å                                         | 16.2280(18)                                                    |
| b/Å                                         | 16.3739(19)                                                    |
| c/Å                                         | 17.6769(19)                                                    |
| α/°                                         | 90                                                             |
| β/°                                         | 93.710(8)                                                      |
| γ/°                                         | 90                                                             |
| Volume/Å <sup>3</sup>                       | 4687.2(9)                                                      |
| Z                                           | 4                                                              |
| ρ <sub>calc</sub> /cm <sup>3</sup>          | 1.178                                                          |
| μ/mm <sup>-1</sup>                          | 0.133                                                          |
| F(000)                                      | 1784.0                                                         |
| Crystal size/mm <sup>3</sup>                | 0.16 × 0.13 × 0.11                                             |
| Radiation                                   | MoKα (λ = 0.71073)                                             |
| 2θ range for data collection/°              | 3.302 to 50.844                                                |
| Index ranges                                | -19 ≤ h ≤ 19, -19 ≤ k ≤ 19, -21 ≤ l ≤ 21                       |
| Reflections collected                       | 50415                                                          |
| Independent reflections                     | 8602 [R <sub>int</sub> = 0.1256, R <sub>sigma</sub> = 0.0828]  |
| Data/restraints/parameters                  | 8602/0/561                                                     |
| Goodness-of-fit on F <sup>2</sup>           | 1.012                                                          |
| Final R indexes [I ≥ 2σ (I)]                | R <sub>1</sub> = 0.0549, wR <sub>2</sub> = 0.1173              |
| Final R indexes [all data]                  | R <sub>1</sub> = 0.1117, wR <sub>2</sub> = 0.1454              |
| Largest diff. peak/hole / e Å <sup>-3</sup> | 0.35/-0.38                                                     |

**Table S6** Crystal data and structure refinement for compound **6** (CCDC: 1588459)

|                                             |                                                               |
|---------------------------------------------|---------------------------------------------------------------|
| Identification code                         | DD_701                                                        |
| Empirical formula                           | C <sub>48</sub> H <sub>52</sub> P <sub>2</sub>                |
| Formula weight                              | 690.83                                                        |
| Temperature/K                               | 296.15                                                        |
| Crystal system                              | monoclinic                                                    |
| Space group                                 | P2 <sub>1</sub> /c                                            |
| a/Å                                         | 8.3846(12)                                                    |
| b/Å                                         | 21.347(3)                                                     |
| c/Å                                         | 11.6195(15)                                                   |
| α/°                                         | 90                                                            |
| β/°                                         | 111.081(9)                                                    |
| γ/°                                         | 90                                                            |
| Volume/Å <sup>3</sup>                       | 1940.5(5)                                                     |
| Z                                           | 2                                                             |
| ρ <sub>calc</sub> /g/cm <sup>3</sup>        | 1.182                                                         |
| μ/mm <sup>-1</sup>                          | 0.145                                                         |
| F(000)                                      | 740.0                                                         |
| Crystal size/mm <sup>3</sup>                | ? × ? × ?                                                     |
| Radiation                                   | MoKα (λ = 0.71073)                                            |
| 2θ range for data collection/°              | 3.816 to 52.21                                                |
| Index ranges                                | -10 ≤ h ≤ 10, -26 ≤ k ≤ 26, -14 ≤ l ≤ 14                      |
| Reflections collected                       | 26426                                                         |
| Independent reflections                     | 3854 [R <sub>int</sub> = 0.0631, R <sub>sigma</sub> = 0.0396] |
| Data/restraints/parameters                  | 3854/0/236                                                    |
| Goodness-of-fit on F <sup>2</sup>           | 1.042                                                         |
| Final R indexes [I ≥ 2σ (I)]                | R <sub>1</sub> = 0.0421, wR <sub>2</sub> = 0.1039             |
| Final R indexes [all data]                  | R <sub>1</sub> = 0.0594, wR <sub>2</sub> = 0.1147             |
| Largest diff. peak/hole / e Å <sup>-3</sup> | 0.33/-0.28                                                    |

**Table S7** Crystal data and structure refinement for compound **7** (CCDC: 1588460)

|                                             |                                                                |
|---------------------------------------------|----------------------------------------------------------------|
| Identification code                         | VC_AJ_689R                                                     |
| Empirical formula                           | C <sub>31</sub> H <sub>37</sub> N <sub>2</sub> P               |
| Formula weight                              | 468.59                                                         |
| Temperature/K                               | 100(2)                                                         |
| Crystal system                              | monoclinic                                                     |
| Space group                                 | P2 <sub>1</sub> /c                                             |
| a/Å                                         | 8.304(3)                                                       |
| b/Å                                         | 23.286(8)                                                      |
| c/Å                                         | 13.900(5)                                                      |
| $\alpha$ /°                                 | 90                                                             |
| $\beta$ /°                                  | 90.34(2)                                                       |
| $\gamma$ /°                                 | 90                                                             |
| Volume/Å <sup>3</sup>                       | 2687.8(17)                                                     |
| Z                                           | 4                                                              |
| $\rho_{\text{calc}}$ /g/cm <sup>3</sup>     | 1.158                                                          |
| $\mu$ /mm <sup>-1</sup>                     | 0.123                                                          |
| F(000)                                      | 1008.0                                                         |
| Crystal size/mm <sup>3</sup>                | 0.19 × 0.16 × 0.14                                             |
| Radiation                                   | MoK $\alpha$ ( $\lambda$ = 0.71073)                            |
| 2 $\theta$ range for data collection/°      | 3.412 to 59.208                                                |
| Index ranges                                | -11 ≤ h ≤ 11, -31 ≤ k ≤ 32, -18 ≤ l ≤ 19                       |
| Reflections collected                       | 47573                                                          |
| Independent reflections                     | 7476 [ $R_{\text{int}}$ = 0.0829, $R_{\text{sigma}}$ = 0.0661] |
| Data/restraints/parameters                  | 7476/0/317                                                     |
| Goodness-of-fit on F <sup>2</sup>           | 1.022                                                          |
| Final R indexes [ $I \geq 2\sigma(I)$ ]     | $R_1$ = 0.0556, $wR_2$ = 0.1330                                |
| Final R indexes [all data]                  | $R_1$ = 0.1245, $wR_2$ = 0.1634                                |
| Largest diff. peak/hole / e Å <sup>-3</sup> | 0.26/-0.31                                                     |

## Computational Calculation

### *Computational Method:*

All theoretical calculations, in this paper are carried out using the Gaussian16 suite of program.<sup>S10</sup> The full geometry optimizations of **1-7** and were performed at B3LYP/6-311G(d,p) level of theory. Frequency analyses were performed to determine the  $\Delta E$ ,  $\Delta H$ , and  $\Delta G$  relative energies, as given in Table S8 in solution (CPCM method, Solvent = tetrahydrofuran) at B3LYP/6-311G(d,p) level of theory including D3 dispersion correction by Grimme.<sup>S11,S12</sup> Wiberg bond orders (WBI) as a criterion to estimate the bond orders of chemical structures were also calculated within the natural bond orbital (NBO) analysis for **1-7** (Table S8).<sup>S13</sup> The spin-spin couplings were calculated by the GIAO method (Solvent = benzene) for *meso-6* and *d/l-6* and selected parameters at B3LYP/6-311G(d,p) level of theory are given in Table S10. The GaussView 5.0 program was employed for visualization of the final geometries of the optimized structures.<sup>S14</sup>

**Table S8** Selected structural parameters of the compounds **1-7** at the B3LYP/6-311G(d,p) level of theory.

|               | P <sup>1</sup> -P <sup>2</sup>     | P <sup>1</sup> -P <sup>2</sup><br>(WBI) | P <sup>1</sup> -<br>C <sup>NHC</sup> | P <sup>1</sup> -C <sup>NHC</sup><br>(WBI) | C-P <sup>1</sup> -P <sup>2</sup> -C<br>(Dihedral) | Pyramidalization<br>P <sup>1</sup> -NHC | Charge<br>P <sup>1</sup> P <sup>2</sup> | Hybridization                         |                                       |  |
|---------------|------------------------------------|-----------------------------------------|--------------------------------------|-------------------------------------------|---------------------------------------------------|-----------------------------------------|-----------------------------------------|---------------------------------------|---------------------------------------|--|
|               |                                    |                                         |                                      |                                           |                                                   |                                         |                                         | P <sup>1</sup>                        | P <sup>2</sup>                        |  |
| <b>1</b>      | 2.054                              | 1.812                                   | -                                    | -                                         | 179.9                                             | -                                       | 0.280 0.326                             | 16.54% s; 82.85% p; 0.60%<br><i>d</i> | 17.67% s; 81.76% p; 0.58%<br><i>d</i> |  |
| <b>3</b>      | 2.183                              | 1.116                                   | 1.899                                | 0.849                                     | 149.9                                             | 319.0                                   | 0.494 -0.116                            | 19.79% s; 79.88% p; 0.34%<br><i>d</i> | 11.67% s; 87.77% p; 0.56%<br><i>d</i> |  |
|               | P <sup>1</sup> -P <sup>2</sup>     | P <sup>1</sup> -P <sup>2</sup><br>(WBI) | P <sup>1</sup> =O                    | P <sup>1</sup> =O<br>(WBI)                | C-P1-P <sup>2</sup> -C<br>(Dihedral)              | Pyramidalization<br>P <sup>2</sup>      | Charge<br>P <sup>1</sup> P <sup>2</sup> | Hybridization                         |                                       |  |
|               |                                    |                                         |                                      |                                           |                                                   |                                         |                                         | P <sup>1</sup>                        | P <sup>2</sup>                        |  |
| <b>4</b>      | 2.251                              | 0.870                                   | 1.510                                | 1.252                                     | 170.0                                             | 291.7                                   | 1.410 0.258                             | 22.86% s; 76.21% p; 0.93%<br><i>d</i> | 10.64% s; 88.81% p; 0.54%<br><i>d</i> |  |
| <b>5</b>      | 2.159                              | 1.092                                   | 1.539                                | 0.969                                     | 174.3                                             | -                                       | 1345 -0.187                             | 32.83% s; 66.43% p; 0.74%<br><i>d</i> | 11.72% s; 87.72% p; 0.56%<br><i>d</i> |  |
| <i>meso-6</i> | 2.298                              | 0.954                                   | -                                    | -                                         | 179.9                                             | 290.9                                   | 0.296 0.296                             | 10.40% s; 89.15% p; 0.45%<br><i>d</i> | 10.40% s; 89.15% p; 0.45%<br><i>d</i> |  |
| <i>d/l-6</i>  | 2.289                              | 0.950                                   | -                                    | -                                         | 176.6                                             | 294.3                                   | 0.297 0.297                             | 11.45% s; 88.08% p; 0.46%<br><i>d</i> | 11.45% s; 88.08% p; 0.46%<br><i>d</i> |  |
|               | P <sup>1</sup> -<br>C <sup>1</sup> | P <sup>1</sup> -C <sup>1</sup><br>(WBI) | P <sup>1</sup> -C8                   | P <sup>1</sup> -C8<br>(WBI)               | C1-P1-C8<br>(Angle)                               | -                                       | Charge<br>P <sup>1</sup> C <sup>1</sup> | Hybridization                         |                                       |  |
|               |                                    |                                         |                                      |                                           |                                                   |                                         |                                         | P <sup>1</sup>                        | C <sup>1</sup>                        |  |
| <b>7</b>      | 1.792                              | 1.188                                   | 1.861                                | 0.976                                     | 102.3                                             | -                                       | 0.154 0.152                             | 16.70% s; 82.53% p; 0.78%<br><i>d</i> | 41.44% s; 58.50% p; 0.06%<br><i>d</i> |  |

**Table S9** Thermodynamic values of the reactions at the B3LYP-D3/6-311G(d,p) level of theory (CPCM method, Solvent = THF).

|                                                                              | $\Delta E$ | $\Delta H$ | $\Delta G$ |
|------------------------------------------------------------------------------|------------|------------|------------|
| $1 + 2 \rightarrow 3$                                                        | -22.7      | -22.3      | -6.7       |
| $1 + \text{H}_2\text{O} \rightarrow 4$                                       | -25.6      | -25.3      | -18.9      |
| $3 + \text{H}_2\text{O} \rightarrow 4 + 2$                                   | -2.9       | -3.0       | -12.1      |
| $3 + \text{H}_2\text{O} \rightarrow 5$                                       | -22.4      | -25.1      | -11.9      |
| $4 + 2 \rightarrow 5$                                                        | -19.4      | -22.1      | +0.15      |
| $1 + \text{NH}_3\text{BH}_3 \rightarrow dl6 + \text{NH}_2\text{BH}_2$        | -21.2      | -20.3      | -22.9      |
| $3 + 2\text{NH}_3\text{BH}_3 \rightarrow dl6 + 10 + 2\text{NH}_2\text{BH}_2$ | -0.9       | -1.7       | -17.7      |
| $meso6 \rightarrow dl6$                                                      | +0.96      | +0.34      | +2.3       |

**Table S10** Selected *spin-spin* coupling values for the compounds *meso-6* (Left) and *dl-6* (Right) at the B3LYP/6-311G(d,p) level of theory (CPCM, Solvent = Benzene).

|                      |                                                                                    |                                                                                     |
|----------------------|------------------------------------------------------------------------------------|-------------------------------------------------------------------------------------|
|                      | 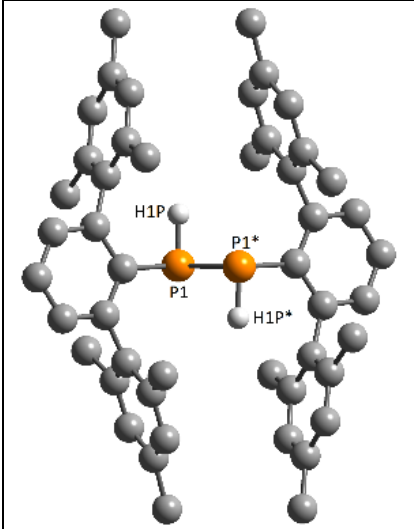 |  |
| $^1J_{(P1-P1^*)}$    | 91.9 Hz                                                                            | 315.0 Hz                                                                            |
| $^3J_{(H1P-H1P^*)}$  | 12.2 Hz                                                                            | 13.1 Hz                                                                             |
| $^1J_{(P1-H1P)}$     | 155.0 Hz                                                                           | 145.0 Hz                                                                            |
| $^2J_{(P1^*-H1P^*)}$ | 155.0 Hz                                                                           | 145.3 Hz                                                                            |



**Table S11** Selected frontier molecular orbitals of the compounds **1-7** at the B3LYP/6-311G(d,p) level of theory.

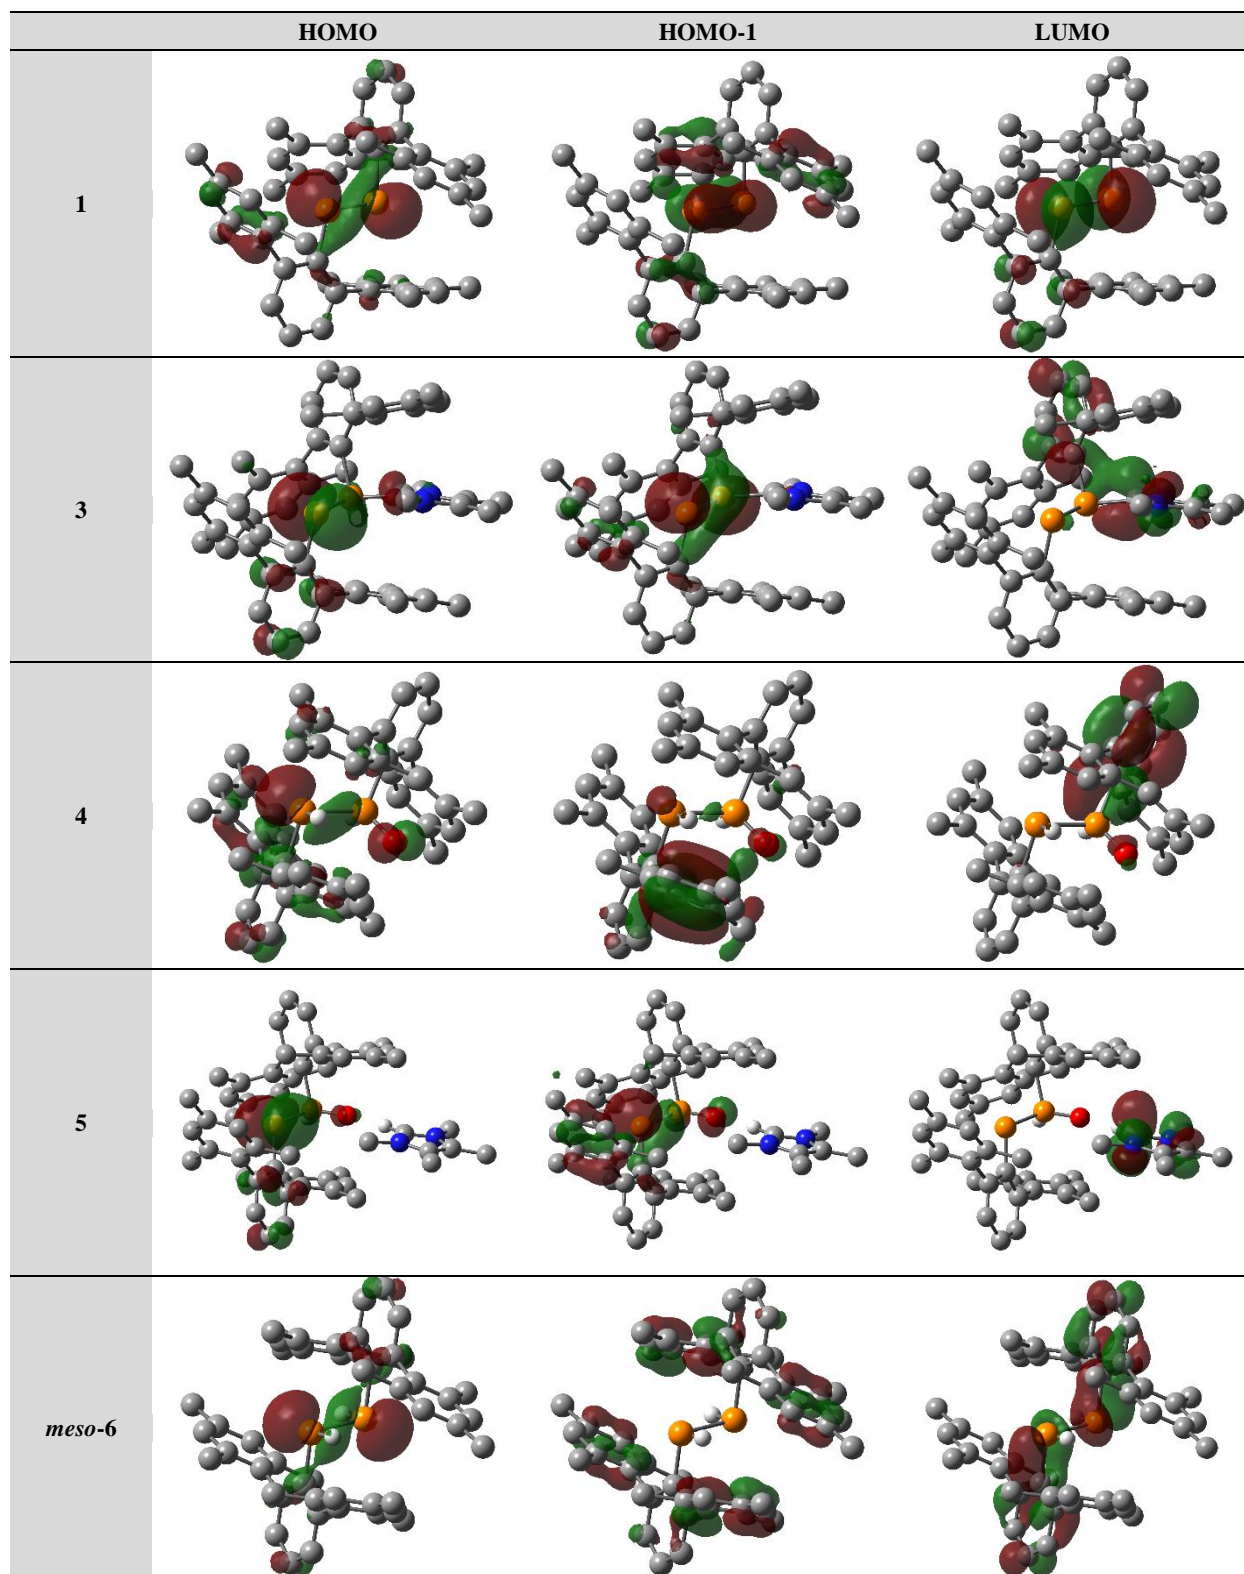

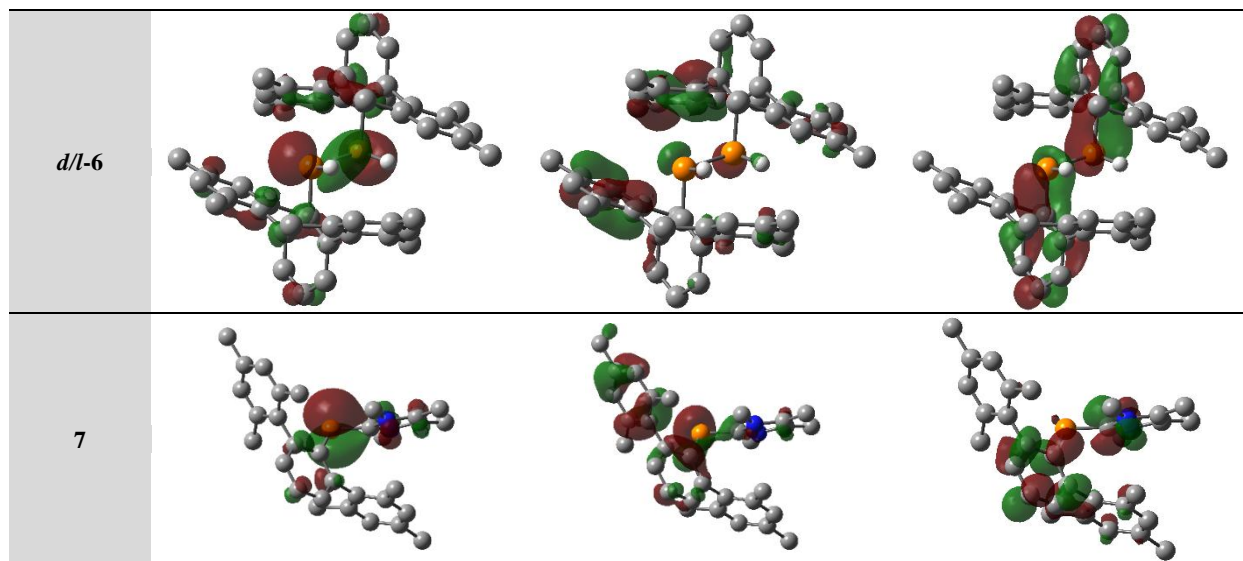

**Table S12** Cartesian coordinates and energy values of **1** in THF.

P,1.159223,0.114924,-0.123598  
P,-0.875486,-0.090906,0.071202  
C,-1.335805,-0.19189,1.864526  
C,-2.745776,-0.255225,2.053124  
C,-3.27719,-0.367631,3.340513  
C,-2.4481,-0.418333,4.452792  
C,-1.071171,-0.352986,4.278913  
C,-0.497059,-0.237862,3.008708  
C,1.000036,-0.171197,2.972793  
C,1.75366,-1.360579,2.919227  
C,3.145052,-1.283396,2.970956  
C,3.813503,-0.06275,3.079984  
C,3.047777,1.099389,3.147411  
C,1.651758,1.069714,3.099422  
C,0.875462,2.363998,3.162646  
C,5.322401,-0.009518,3.115459  
C,1.080573,-2.70746,2.79956  
C,-3.7299,-0.202424,0.916559  
C,-4.238755,1.038259,0.482954  
C,-5.20053,1.061483,-0.526734  
C,-5.679758,-0.108917,-1.118245  
C,-5.170392,-1.324698,-0.667239  
C,-4.206433,-1.394523,0.342023  
C,-3.680293,-2.740379,0.782621  
C,-6.724496,-0.050734,-2.20711  
C,-3.746472,2.336582,1.078091  
C,1.210257,0.180639,-1.992348  
C,1.260893,1.436082,-2.635712  
C,1.422537,1.489761,-4.02417  
C,1.552592,0.326506,-4.774159  
C,1.531158,-0.908339,-4.136115  
C,1.369935,-1.001601,-2.749346  
C,1.400332,-2.366795,-2.123377  
C,0.258282,-3.194062,-2.168195  
C,0.323799,-4.472793,-1.614142  
C,1.490412,-4.966875,-1.026975  
C,2.612944,-4.142852,-1.013755  
C,2.592163,-2.853045,-1.552884  
C,3.849252,-2.014965,-1.50938  
C,1.524971,-6.348656,-0.418498  
C,-1.028858,-2.72274,-2.80241  
C,1.168557,2.728144,-1.875101  
C,2.323775,3.285876,-1.289704  
C,2.225837,4.508873,-0.62383  
C,1.019375,5.201799,-0.524446  
C,-0.106664,4.642835,-1.12729  
C,-0.05516,3.422586,-1.805479  
C,-1.307934,2.870552,-2.442641  
C,0.938167,6.511965,0.22226  
C,3.66231,2.588595,-1.365697  
H,-4.354317,-0.413552,3.457774  
H,-2.869829,-0.507096,5.447973  
H,-0.413303,-0.388889,5.14056  
H,3.721149,-2.203321,2.929705  
H,3.546807,2.058891,3.245513  
H,1.541817,3.203751,3.367622  
H,0.106132,2.340326,3.938544  
H,0.37055,2.565069,2.212787  
H,5.746514,-0.190612,2.122182

H,5.73234,-0.770115,3.785713  
 H,5.678877,0.965616,3.453694  
 H,1.821638,-3.50776,2.768086  
 H,0.482539,-2.772562,1.88618  
 H,0.406897,-2.897801,3.639803  
 H,-5.588313,2.020958,-0.857411  
 H,-5.530774,-2.248114,-1.110774  
 H,-2.603781,-2.822348,0.603635  
 H,-3.837733,-2.907631,1.851691  
 H,-4.173711,-3.546817,0.237042  
 H,-6.37854,0.545436,-3.057086  
 H,-7.649985,0.408721,-1.845457  
 H,-6.969863,-1.048318,-2.576542  
 H,-2.698665,2.517613,0.818123  
 H,-3.806279,2.332216,2.169381  
 H,-4.333104,3.179384,0.707885  
 H,1.455142,2.458723,-4.510956  
 H,1.681728,0.382489,-5.849472  
 H,1.650895,-1.82034,-4.711109  
 H,-0.560207,-5.103133,-1.649803  
 H,3.538054,-4.51249,-0.581082  
 H,4.717813,-2.63553,-1.279921  
 H,3.779942,-1.241848,-0.737143  
 H,4.031806,-1.507207,-2.458899  
 H,2.550638,-6.690231,-0.263704  
 H,1.021426,-6.363672,0.554225  
 H,1.018048,-7.078091,-1.055995  
 H,-1.822129,-3.458628,-2.657385  
 H,-0.912604,-2.560655,-3.878042  
 H,-1.363251,-1.775498,-2.371187  
 H,3.121113,4.934495,-0.179496  
 H,-1.05324,5.172961,-1.077365  
 H,-1.565071,1.890452,-2.030301  
 H,-2.154169,3.53929,-2.274496  
 H,-1.189228,2.738789,-3.521559  
 H,1.797606,7.150707,0.001358  
 H,0.925259,6.348132,1.305265  
 H,0.03197,7.06346,-0.03741  
 H,3.701484,1.737399,-0.67808  
 H,4.469103,3.272087,-1.09405  
 H,3.862618,2.202551,-2.367442

|                                              |                             |
|----------------------------------------------|-----------------------------|
| Zero-point correction=                       | 0.829936 (Hartree/Particle) |
| Thermal correction to Energy=                | 0.878296                    |
| Thermal correction to Enthalpy=              | 0.879240                    |
| Thermal correction to Gibbs Free Energy=     | 0.743189                    |
| Sum of electronic and zero-point Energies=   | -2541.790561                |
| Sum of electronic and thermal Energies=      | -2541.742201                |
| Sum of electronic and thermal Enthalpies=    | -2541.741257                |
| Sum of electronic and thermal Free Energies= | -2541.877308                |

**Table S13** Cartesian coordinates and energy values of **2** in THF.

N,1.060515,-0.708087,0.000098  
 N,-1.060524,-0.708066,0.000074  
 C,-0.000016,-1.567764,0.000189  
 C,0.680674,0.639596,-0.000023  
 C,-0.680662,0.639609,-0.000094  
 C,1.659023,1.76642,-0.000145  
 H,2.307357,1.745464,0.882682

H,1.138676,2.725506,-0.001679  
H,2.309091,1.743575,-0.88163  
C,-1.659006,1.766438,0.00018  
H,-2.309197,1.743905,-0.881224  
H,-1.138658,2.725524,-0.00109  
H,-2.307214,1.745166,0.88309  
C,-2.435357,-1.176807,-0.000203  
H,-2.972771,-0.832791,0.88848  
H,-2.97226,-0.833204,-0.889354  
H,-2.401529,-2.264078,0.000055  
C,2.435347,-1.176811,0.000013  
H,2.972241,-0.833658,-0.889325  
H,2.972762,-0.832342,0.888511  
H,2.401548,-2.264086,0.000787

|                                              |                             |
|----------------------------------------------|-----------------------------|
| Zero-point correction=                       | 0.181307 (Hartree/Particle) |
| Thermal correction to Energy=                | 0.191583                    |
| Thermal correction to Enthalpy=              | 0.192527                    |
| Thermal correction to Gibbs Free Energy=     | 0.146438                    |
| Sum of electronic and zero-point Energies=   | -383.374856                 |
| Sum of electronic and thermal Energies=      | -383.364580                 |
| Sum of electronic and thermal Enthalpies=    | -383.363635                 |
| Sum of electronic and thermal Free Energies= | -383.409725                 |

**Table S14** Cartesian coordinates and energy values of **3** in THF.

P,-0.560779,-0.434131,0.401237  
P,1.083137,0.653049,-0.539095  
N,-2.600831,0.896943,-1.338136  
N,-3.32616,-0.758958,-0.157091  
C,1.432425,-1.620152,-2.469546  
C,-1.818181,2.615552,1.63102  
C,0.062578,-2.230455,-2.360919  
C,-3.181031,2.846206,1.367407  
C,-0.865909,3.595717,1.264068  
C,0.554177,-1.817475,2.989181  
C,-1.393752,1.483082,2.529849  
C,3.225149,-0.028827,-2.091651  
C,-0.28175,-0.580747,3.191258  
C,-0.75973,0.26703,2.149141  
C,-3.565661,4.003003,0.678778  
H,-4.621186,4.166846,0.479248  
C,1.90945,-0.485347,-1.758272  
C,-1.295108,4.737949,0.585177  
H,-0.556321,5.484947,0.309938  
C,-0.960588,-1.789504,-3.219911  
C,-0.145726,-3.3773,-1.568252  
C,-2.638328,4.961633,0.275875  
C,0.00295,-3.106019,3.097875  
C,1.959233,-1.670875,2.898733  
C,2.220607,-4.100335,2.880122  
C,3.867958,1.160774,-1.431165  
C,2.757691,-2.811779,2.830317  
H,3.834287,-2.688833,2.759419  
C,0.843848,-4.222378,3.02924  
H,0.403806,-5.213066,3.108689  
C,-2.239861,0.041737,-0.349335  
C,2.248089,-2.258467,-3.416011  
H,1.848394,-3.125596,-3.932882  
C,3.688241,2.458163,-1.94907

C,3.995691,-0.681497,-3.053081  
H,4.987107,-0.296061,-3.269348  
C,-1.816452,2.018841,-1.85283  
H,-2.171375,2.946651,-1.407389  
H,-1.924299,2.058179,-2.936533  
H,-0.766729,1.859703,-1.597483  
C,2.612569,-0.310659,2.92831  
H,2.403319,0.250686,2.011824  
H,3.694644,-0.408917,3.025999  
H,2.249013,0.286548,3.768543  
C,3.523037,-1.806137,-3.719105  
H,4.130883,-2.312231,-4.460627  
C,-1.368773,-4.046649,-1.640697  
H,-1.513788,-4.937152,-1.034638  
C,-3.906686,0.648754,-1.748341  
C,-1.606261,1.763241,3.889108  
H,-2.092095,2.697233,4.150113  
C,0.944546,-3.897889,-0.666458  
H,1.833891,-4.174297,-1.239706  
H,0.607548,-4.775491,-0.112239  
H,1.252413,-3.139396,0.05659  
C,-2.175482,-2.482866,-3.259115  
H,-2.953694,-2.141101,-3.936504  
C,4.344568,3.53202,-1.344979  
H,4.192488,4.530857,-1.745215  
C,0.583714,3.479092,1.666625  
H,0.679306,3.406512,2.754378  
H,1.146162,4.3527,1.332729  
H,1.060294,2.594748,1.238048  
C,-4.366045,-0.393844,-1.00093  
C,-0.509534,-0.252576,4.532124  
H,-0.132968,-0.92282,5.29696  
C,-0.733723,-0.623463,-4.153103  
H,-0.25821,0.214494,-3.640527  
H,-1.675475,-0.285389,-4.593308  
H,-0.065861,-0.906124,-4.973361  
C,4.739906,0.963049,-0.344055  
C,-4.259138,1.91786,1.880439  
H,-3.924959,0.881885,1.917635  
H,-5.154307,1.976158,1.257  
H,-4.552059,2.190993,2.900164  
C,-1.470839,-3.348723,3.339468  
H,-2.042263,-2.423013,3.368177  
H,-1.622514,-3.858404,4.296663  
H,-1.894065,-3.995691,2.564629  
C,-1.188136,0.902539,4.890072  
H,-1.364733,1.140913,5.933134  
C,5.374961,2.064078,0.234522  
H,6.034969,1.90283,1.082493  
C,3.112609,-5.313935,2.778937  
H,3.441545,-5.474525,1.7466  
H,2.594734,-6.218626,3.105341  
H,4.01209,-5.199269,3.390168  
C,2.797546,2.702193,-3.144315  
H,3.144065,2.147734,-4.021251  
H,2.773462,3.763787,-3.400536  
H,1.774659,2.374258,-2.938592  
C,-2.39539,-3.621687,-2.48653  
C,-4.579818,1.452501,-2.80812  
H,-4.574177,2.518892,-2.565354  
H,-5.618058,1.138885,-2.917085

H,-4.092999,1.331409,-3.780618  
 C,-3.065864,6.215754,-0.449443  
 H,-4.147994,6.243801,-0.59428  
 H,-2.592857,6.289536,-1.433912  
 H,-2.780912,7.111845,0.110421  
 C,-3.378787,-1.872117,0.779645  
 H,-2.370887,-2.268811,0.885643  
 H,-4.033307,-2.646316,0.384112  
 H,-3.744909,-1.544997,1.755036  
 C,5.188404,3.358886,-0.24751  
 C,5.009082,-0.424198,0.188191  
 H,4.080141,-0.967514,0.37315  
 H,5.578049,-0.378707,1.119394  
 H,5.585393,-1.017508,-0.528755  
 C,-5.689448,-1.080612,-1.001445  
 H,-5.607906,-2.122301,-1.325936  
 H,-6.373353,-0.576574,-1.684319  
 H,-6.147759,-1.074727,-0.007952  
 C,-3.678798,-4.411502,-2.603574  
 H,-3.542956,-5.290292,-3.243545  
 H,-4.480233,-3.812897,-3.044257  
 H,-4.02011,-4.778,-1.630773  
 C,5.90704,4.533674,0.373542  
 H,6.827311,4.770428,-0.172741  
 H,6.186348,4.326984,1.409457  
 H,5.284916,5.432664,0.364857

|                                              |                             |
|----------------------------------------------|-----------------------------|
| Zero-point correction=                       | 1.015711 (Hartree/Particle) |
| Thermal correction to Energy=                | 1.075962                    |
| Thermal correction to Enthalpy=              | 1.076906                    |
| Thermal correction to Gibbs Free Energy=     | 0.919413                    |
| Sum of electronic and zero-point Energies=   | -2925.201595                |
| Sum of electronic and thermal Energies=      | -2925.141344                |
| Sum of electronic and thermal Enthalpies=    | -2925.140400                |
| Sum of electronic and thermal Free Energies= | -2925.297893                |

**Table S15** Cartesian coordinates and energy values of **4** in THF.

P,0.506993,-0.642716,-0.572968  
 P,-0.823216,0.619807,0.733355  
 O,0.00098,-0.930133,-1.966539  
 C,-0.947781,2.186223,-0.270445  
 C,0.036168,3.184951,-0.068505  
 C,-0.087154,4.421043,-0.70993  
 H,0.677298,5.172457,-0.54573  
 C,-1.172607,4.696102,-1.530697  
 H,-1.261654,5.661388,-2.016888  
 C,-2.151369,3.728669,-1.710369  
 H,-3.01227,3.9376,-2.335775  
 C,-2.064888,2.473303,-1.094414  
 C,1.230819,3.002337,0.823672  
 C,1.109531,3.181769,2.219407  
 C,2.249976,3.09253,3.017113  
 H,2.149388,3.235507,4.089214  
 C,3.514168,2.847282,2.478044  
 C,3.61689,2.702256,1.096813  
 H,4.59155,2.52918,0.650566  
 C,2.501389,2.783533,0.257065  
 C,-0.219859,3.496101,2.86271  
 H,-0.738682,4.303067,2.339484

H,-0.082814,3.79576,3.903427  
H,-0.881354,2.624384,2.849725  
C,4.726664,2.735245,3.3708  
H,4.795901,1.737344,3.817988  
H,4.684109,3.455539,4.191807  
H,5.649911,2.910885,2.814345  
C,2.70745,2.685659,-1.238947  
H,2.851581,3.679893,-1.676371  
H,1.855368,2.238086,-1.751481  
H,3.594105,2.091403,-1.467502  
C,-3.222729,1.545335,-1.335174  
C,-4.289437,1.512432,-0.414313  
C,-5.41185,0.731415,-0.696252  
H,-6.233228,0.721155,0.014376  
C,-5.512007,-0.016616,-1.868883  
C,-4.453879,0.044055,-2.77399  
H,-4.517148,-0.516374,-3.702132  
C,-3.312142,0.814605,-2.537527  
C,-4.25096,2.316878,0.865092  
H,-3.481694,1.948545,1.551735  
H,-5.209893,2.26057,1.38362  
H,-4.027986,3.370004,0.674982  
C,-6.723183,-0.875571,-2.144411  
H,-6.57961,-1.893776,-1.765219  
H,-6.92061,-0.954331,-3.216148  
H,-7.617568,-0.471986,-1.663673  
C,-2.208201,0.838009,-3.566994  
H,-1.91168,1.858782,-3.821351  
H,-2.532079,0.341417,-4.484138  
H,-1.322424,0.31682,-3.191829  
C,1.055992,-2.171664,0.311286  
C,2.364844,-2.640183,0.031953  
C,2.78073,-3.861936,0.571397  
H,3.784022,-4.21026,0.352569  
C,1.931909,-4.626242,1.360625  
H,2.267995,-5.575208,1.763999  
C,0.646763,-4.171951,1.621154  
H,-0.028848,-4.765534,2.226845  
C,0.187208,-2.95565,1.102744  
C,3.365247,-1.908999,-0.820187  
C,4.351692,-1.116039,-0.201518  
C,5.326657,-0.504265,-0.992903  
H,6.08728,0.102376,-0.510222  
C,5.358477,-0.664857,-2.377977  
C,4.387799,-1.475802,-2.965299  
H,4.406706,-1.632144,-4.039904  
C,3.393948,-2.109468,-2.216008  
C,4.380492,-0.927109,1.297677  
H,5.207079,-0.276747,1.587914  
H,4.499867,-1.880367,1.820282  
H,3.455977,-0.474912,1.666673  
C,6.406491,0.0214,-3.221231  
H,7.242968,0.370964,-2.612177  
H,5.987883,0.891294,-3.738867  
H,6.80308,-0.64996,-3.98756  
C,2.386384,-2.992679,-2.913165  
H,2.285851,-3.959592,-2.413042  
H,2.688581,-3.174668,-3.946269  
H,1.400137,-2.519606,-2.919634  
C,-1.227179,-2.581609,1.434945  
C,-2.268844,-2.885869,0.537081



C,-3.585737,-2.606221,0.915344  
 H,-4.385869,-2.833243,0.218536  
 C,-3.899724,-2.054048,2.155116  
 C,-2.851998,-1.777789,3.035614  
 H,-3.073988,-1.352294,4.010121  
 C,-1.522703,-2.036725,2.703727  
 C,-1.997789,-3.513662,-0.810692  
 H,-1.476544,-2.820944,-1.477774  
 H,-2.933842,-3.805009,-1.290348  
 H,-1.372452,-4.405673,-0.715251  
 C,-5.329705,-1.774624,2.550392  
 H,-6.01909,-2.005422,1.736505  
 H,-5.46764,-0.723112,2.819052  
 H,-5.622953,-2.37215,3.419578  
 C,-0.433236,-1.735209,3.707142  
 H,-0.851131,-1.254134,4.593191  
 H,0.324809,-1.067861,3.289225  
 H,0.082058,-2.644725,4.029063  
 H,1.692796,0.121649,-0.535949  
 H,-2.004092,0.010619,0.254418

|                                              |                             |
|----------------------------------------------|-----------------------------|
| Zero-point correction=                       | 0.854341 (Hartree/Particle) |
| Thermal correction to Energy=                | 0.907024                    |
| Thermal correction to Enthalpy=              | 0.907969                    |
| Thermal correction to Gibbs Free Energy=     | 0.760630                    |
| Sum of electronic and zero-point Energies=   | -2618.263464                |
| Sum of electronic and thermal Energies=      | -2618.210780                |
| Sum of electronic and thermal Enthalpies=    | -2618.209836                |
| Sum of electronic and thermal Free Energies= | -2618.357174                |

**Table S16** Cartesian coordinates and energy values of **5** in THF.

P,0.592069,-0.644898,0.455775  
 P,0.713319,1.433197,-0.118545  
 O,-0.662532,-1.484436,0.156207  
 C,3.414414,-2.136273,-2.357254  
 H,4.470966,-2.233592,-2.12798  
 C,2.867899,-0.857983,-2.462322  
 C,2.180938,-0.728265,2.824719  
 C,0.922817,0.652457,-2.986567  
 C,-2.18965,1.26629,2.765049  
 C,4.353174,-0.141915,1.674999  
 C,-0.171662,-0.205479,3.192908  
 C,2.64587,-3.288416,-2.537336  
 C,1.492186,-0.714777,-2.748008  
 C,0.884242,-0.507735,2.29689  
 C,3.396843,-1.11611,2.025077  
 C,1.295613,-3.12965,-2.834196  
 H,0.677684,-4.011003,-2.985732  
 C,-1.628803,-0.024221,2.847014  
 C,-0.38159,6.288683,0.249459  
 C,0.709495,-1.865467,-2.950894  
 C,2.401508,-0.619329,4.203163  
 H,3.402206,-0.794741,4.582839  
 C,-1.253986,4.373628,-0.982124  
 C,0.763586,1.001867,-4.334882  
 H,1.000635,0.258111,-5.089524  
 C,-3.576552,1.396646,2.627704  
 H,-3.998647,2.395844,2.567792  
 C,1.370884,-0.299977,5.074336

H,1.556262,-0.216799,6.139796  
C,0.624995,1.593862,-1.961461  
C,3.661814,-2.476906,1.776884  
C,0.896821,5.953428,-0.195681  
H,1.741015,6.568525,0.103879  
C,0.04314,4.043645,-1.4153  
C,0.133146,3.223756,-3.735999  
H,-0.14507,4.23703,-4.008988  
C,0.09649,-0.102509,4.565509  
H,-0.724561,0.128993,5.235464  
C,1.128726,4.850972,-1.020438  
C,4.867241,-2.838549,1.170962  
H,5.064915,-3.890514,0.985536  
C,0.263427,2.911776,-2.382978  
C,-3.853196,-0.974827,2.692962  
H,-4.49653,-1.8513,2.696042  
C,5.542164,-0.549203,1.065461  
H,6.271958,0.207562,0.792016  
C,-2.47419,-1.15228,2.826275  
C,5.823248,-1.890844,0.809123  
C,-1.445196,5.485452,-0.159484  
H,-2.452263,5.728972,0.16838  
C,-4.427512,0.293584,2.597058  
C,-0.751596,-1.759569,-3.317473  
H,-1.255572,-1.024287,-2.689783  
H,-1.248701,-2.725929,-3.196985  
H,-0.885388,-1.444066,-4.357189  
C,0.358977,2.270773,-4.724392  
H,0.252275,2.521751,-5.773948  
C,-1.337482,2.509088,2.829468  
H,-0.673269,2.497813,3.697259  
H,-1.961355,3.40321,2.886833  
H,-0.706342,2.587377,1.938842  
C,4.122867,1.323532,1.957884  
H,3.198689,1.673939,1.489026  
H,4.950546,1.923888,1.5746  
H,4.037003,1.515484,3.031675  
C,-1.914417,-2.547055,2.969316  
H,-1.234436,-2.764561,2.141829  
H,-2.71795,-3.288561,2.978538  
H,-1.346313,-2.657312,3.897312  
C,3.755441,0.350649,-2.294531  
H,4.788516,0.049338,-2.113246  
H,3.423289,0.963159,-1.45177  
H,3.729067,0.985421,-3.185097  
C,3.271366,-4.658196,-2.422818  
H,4.041358,-4.809511,-3.186673  
H,2.525874,-5.448046,-2.542042  
H,3.75198,-4.792739,-1.449009  
C,2.668021,-3.551017,2.154655  
H,2.39122,-3.490372,3.210719  
H,3.082871,-4.543562,1.967104  
H,1.742926,-3.458713,1.577264  
C,-0.600802,7.468299,1.167051  
H,-0.426319,7.192753,2.213289  
H,-1.623859,7.845793,1.094493  
H,0.080122,8.29034,0.930775  
C,-2.435905,3.523328,-1.378805  
H,-2.562838,3.485679,-2.464681  
H,-3.358731,3.907377,-0.937417  
H,-2.283475,2.497741,-1.031592

C,2.536163,4.5401,-1.471625  
 H,3.240295,5.276413,-1.078087  
 H,2.618284,4.536583,-2.562125  
 H,2.845177,3.550753,-1.123208  
 C,-5.927632,0.468842,2.528734  
 H,-6.356091,0.594114,3.52941  
 H,-6.414908,-0.400469,2.077982  
 H,-6.203618,1.354571,1.949839  
 C,7.138018,-2.302619,0.189511  
 H,7.943591,-2.29755,0.932201  
 H,7.433652,-1.619446,-0.611351  
 H,7.084311,-3.310458,-0.228547  
 H,1.722074,-1.413743,0.100125  
 N,-3.785874,-3.574996,-0.870436  
 N,-3.89948,-1.424467,-1.029114  
 C,-5.130521,-1.9168,-1.455266  
 C,-5.062052,-3.279998,-1.355716  
 C,-3.108416,-2.437392,-0.682245  
 H,-2.079082,-2.296094,-0.31778  
 C,-3.244307,-4.905283,-0.605736  
 H,-3.831965,-5.407911,0.163828  
 H,-2.219312,-4.793143,-0.258327  
 H,-3.250713,-5.504008,-1.517626  
 C,-6.063973,-4.339174,-1.666028  
 H,-5.703624,-5.025389,-2.438644  
 H,-6.986611,-3.8886,-2.030613  
 H,-6.313531,-4.933664,-0.781694  
 C,-6.231912,-1.020309,-1.907243  
 H,-6.5333,-0.329468,-1.114741  
 H,-7.106397,-1.604511,-2.192908  
 H,-5.931566,-0.422133,-2.772362  
 C,-3.485527,-0.018368,-0.9487  
 H,-3.519219,0.431382,-1.941099  
 H,-2.466926,0.006511,-0.56047  
 H,-4.141317,0.51803,-0.264697

|                                              |                             |
|----------------------------------------------|-----------------------------|
| Zero-point correction=                       | 1.038753 (Hartree/Particle) |
| Thermal correction to Energy=                | 1.098433                    |
| Thermal correction to Enthalpy=              | 1.099377                    |
| Thermal correction to Gibbs Free Energy=     | 0.941391                    |
| Sum of electronic and zero-point Energies=   | -3001.669289                |
| Sum of electronic and thermal Energies=      | -3001.609609                |
| Sum of electronic and thermal Enthalpies=    | -3001.608665                |
| Sum of electronic and thermal Free Energies= | -3001.766651                |

**Table S17** Cartesian coordinates and energy values of *d/I-6* in THF.

P,0.055919,0.82572,0.788859  
 C,0.00169,2.364156,-0.265102  
 C,-3.437278,1.92558,-1.166865  
 C,1.231304,2.972926,-0.614486  
 C,-1.207294,2.992627,-0.661431  
 C,3.020213,2.905379,1.155126  
 C,2.583136,2.525967,-0.132858  
 C,3.482694,1.905883,-1.020442  
 C,-2.587352,2.566123,-0.248902  
 C,3.059524,1.477059,-2.406922  
 H,2.205222,0.796356,-2.367217  
 H,3.875772,0.958228,-2.912631  
 H,2.765383,2.329118,-3.026277

C,4.800733,1.68828,-0.609421  
H,5.490202,1.216543,-1.301964  
C,-5.289886,2.089969,0.413912  
C,5.254189,2.063441,0.652197  
C,-1.15734,4.149561,-1.44832  
H,-2.090772,4.617762,-1.740621  
C,1.234243,4.126834,-1.408781  
H,2.187022,4.576912,-1.664311  
C,-4.771603,1.695148,-0.815527  
H,-5.42083,1.202031,-1.532292  
C,4.342015,2.658869,1.524231  
H,4.672329,2.961988,2.513916  
C,-3.092325,2.969857,1.007334  
C,0.051449,4.708306,-1.839465  
H,0.069832,5.603998,-2.450577  
C,-2.96002,1.520553,-2.543552  
H,-3.00157,2.36392,-3.241426  
H,-3.587466,0.724366,-2.948985  
H,-1.926943,1.170537,-2.534297  
C,2.099536,3.594794,2.133915  
H,1.586276,4.445204,1.677964  
H,2.658863,3.957651,2.998356  
H,1.327969,2.909484,2.499271  
C,-4.428541,2.720134,1.314874  
H,-4.812774,3.045281,2.277728  
C,6.691008,1.85395,1.066837  
H,6.759469,1.28477,1.999179  
H,7.196419,2.810239,1.237251  
H,7.251569,1.314292,0.301204  
C,-6.737345,1.85526,0.773208  
H,-7.212137,2.775814,1.12533  
H,-6.833299,1.116937,1.576347  
H,-7.306598,1.490554,-0.08382  
C,-2.226064,3.698266,2.008574  
H,-1.420032,3.06373,2.389303  
H,-2.819558,4.026947,2.863688  
H,-1.751801,4.577234,1.564011  
H,-1.332898,0.783128,1.063105  
P,0.063992,-0.829925,-0.792155  
C,0.010584,-2.364141,0.267964  
C,3.492334,-1.894286,1.017565  
C,-1.196739,-2.993228,0.666337  
C,1.242329,-2.968008,0.622011  
C,-3.07797,-2.977127,-1.007437  
C,-2.577189,-2.571864,0.249477  
C,-3.430187,-1.929913,1.164235  
C,2.592254,-2.521221,0.135913  
C,-2.957116,-1.522618,2.541591  
H,-1.926083,-1.166641,2.534115  
H,-3.589791,-0.730628,2.947051  
H,-2.994269,-2.366874,3.238712  
C,-4.762758,-1.698965,0.80747  
H,-5.414294,-1.203442,1.520465  
C,5.260856,-2.059704,-0.657264  
C,-5.277059,-2.09529,-0.423391  
C,1.246786,-4.115862,1.423828  
H,2.199726,-4.563465,1.683255  
C,-1.144983,-4.145944,1.460189  
H,-2.077584,-4.614551,1.754181  
C,4.809393,-1.676843,0.602686  
H,5.499388,-1.199999,1.291102

C,-4.412971,-2.726712,-1.320481  
 H,-4.793009,-3.051055,-2.285252  
 C,3.027913,-2.910826,-1.14986  
 C,0.064605,-4.697901,1.856507  
 H,0.085298,-5.589932,2.473049  
 C,3.072542,-1.463284,2.404307  
 H,2.80946,-2.317739,3.03478  
 H,3.880067,-0.918158,2.895884  
 H,2.199715,-0.806562,2.368745  
 C,-2.207802,-3.705215,-2.005692  
 H,-1.727415,-4.578816,-1.557294  
 H,-2.799696,-4.041941,-2.858802  
 H,-1.406384,-3.067003,-2.390122  
 C,4.349077,-2.66621,-1.522172  
 H,4.680002,-2.980487,-2.508137  
 C,-6.727272,-1.875264,-0.781535  
 H,-6.827557,-1.305097,-1.710416  
 H,-7.24437,-2.828293,-0.932961  
 H,-7.254278,-1.331566,0.004324  
 C,6.69036,-1.828682,-1.085267  
 H,7.135355,-2.741051,-1.493115  
 H,6.752875,-1.064201,-1.867295  
 H,7.308017,-1.498299,-0.24787  
 C,2.107106,-3.609479,-2.121617  
 H,1.334209,-2.927732,-2.491104  
 H,2.665746,-3.977742,-2.984205  
 H,1.595267,-4.457077,-1.659000  
 H,-1.323371,-0.793622,-1.073869

|                                              |                             |
|----------------------------------------------|-----------------------------|
| Zero-point correction=                       | 0.848425 (Hartree/Particle) |
| Thermal correction to Energy=                | 0.898898                    |
| Thermal correction to Enthalpy=              | 0.899842                    |
| Thermal correction to Gibbs Free Energy=     | 0.759007                    |
| Sum of electronic and zero-point Energies=   | -2542.992725                |
| Sum of electronic and thermal Energies=      | -2542.942253                |
| Sum of electronic and thermal Enthalpies=    | -2542.941308                |
| Sum of electronic and thermal Free Energies= | -2543.082143                |

**Table S18** Cartesian coordinates and energy values of *meso-6* in THF.

P,-0.168015,0.817696,0.78925  
 C,-0.363489,2.339537,-0.271387  
 C,-3.766512,1.598766,-1.08978  
 C,0.802659,3.054134,-0.641743  
 C,-1.628596,2.864051,-0.638733  
 C,2.621588,3.110147,1.100128  
 C,2.194499,2.715447,-0.188154  
 C,3.127123,2.18392,-1.097672  
 C,-2.96042,2.327518,-0.196212  
 C,2.73816,1.794358,-2.506889  
 H,1.712954,1.427704,-2.568094  
 H,3.403265,1.015785,-2.886495  
 H,2.809872,2.649974,-3.187581  
 C,4.463315,2.052075,-0.706384  
 H,5.174733,1.637414,-1.413738  
 C,-5.606423,1.652212,0.514558  
 C,4.905049,2.443727,0.553664  
 C,-1.692392,4.024943,-1.420234  
 H,-2.668485,4.412692,-1.690208  
 C,0.692744,4.204609,-1.431495

H,1.598319,4.733684,-1.706709  
C,-5.074673,1.278026,-0.717354  
H,-5.694234,0.726314,-1.416971  
C,3.963313,2.959617,1.445746  
H,4.28565,3.275392,2.433997  
C,-3.475607,2.707618,1.060927  
C,-0.5446,4.685245,-1.834512  
H,-0.615526,5.580785,-2.441968  
C,-3.246026,1.161789,-2.43942  
H,-2.946867,2.014351,-3.055422  
H,-4.008247,0.60159,-2.983563  
H,-2.367762,0.518913,-2.333929  
C,1.670031,3.724863,2.098991  
H,1.086057,4.534516,1.654272  
H,2.217579,4.128153,2.952951  
H,0.959679,2.983263,2.476707  
C,-4.78444,2.357554,1.394236  
H,-5.17826,2.665185,2.358914  
C,6.360449,2.348476,0.94383  
H,6.482127,1.873438,1.921703  
H,6.814596,3.342951,1.010839  
H,6.932318,1.772128,0.214536  
C,-7.024653,1.30269,0.897501  
H,-7.534564,2.155518,1.354259  
H,-7.050206,0.484726,1.625902  
H,-7.606569,0.989301,0.028307  
C,-2.650296,3.507956,2.042154  
H,-1.789347,2.938616,2.405917  
H,-3.249719,3.790963,2.909424  
H,-2.256206,4.420733,1.587572  
H,-1.553019,0.542093,0.900057  
P,0.167118,-0.818718,-0.789685  
C,0.364234,-2.340086,0.27127  
C,3.769632,-1.600452,1.082561  
C,-0.801318,-3.054167,0.644452  
C,1.62995,-2.864687,0.636101  
C,-2.624467,-3.110594,-1.093132  
C,-2.194093,-2.715256,0.193921  
C,-3.12426,-2.182761,1.105305  
C,2.960864,-2.328542,0.190382  
C,-2.73194,-1.792297,2.513347  
H,-1.705886,-1.427705,2.572353  
H,-3.394783,-1.011906,2.893187  
H,-2.804282,-2.64695,3.195199  
C,-4.461387,-2.050643,0.717153  
H,-5.170918,-1.635045,1.425789  
C,5.605058,-1.653136,-0.526923  
C,-4.906373,-2.443133,-0.541441  
C,1.695212,-4.025245,1.418042  
H,2.671813,-4.413075,1.686052  
C,-0.689959,-4.204286,1.434515  
H,-1.595054,-4.733041,1.711912  
C,5.076628,-1.279821,0.707048  
H,5.698389,-0.72915,1.405593  
C,-3.966981,-2.960067,-1.43547  
H,-4.291859,-3.276637,-2.422642  
C,3.472552,-2.70783,-1.068113  
C,0.548157,-4.685059,1.835088  
H,0.620142,-5.580344,2.442791  
C,3.252438,-1.164032,2.433646  
H,2.949379,-2.016363,3.047959

H,4.017818,-0.608782,2.978429  
H,2.377241,-0.516602,2.33016  
C,-1.675467,-3.726145,-2.093913  
H,-1.089928,-4.53503,-1.649892  
H,-2.225242,-4.130648,-2.945867  
H,-0.96646,-2.984683,-2.474459  
C,4.780855,-2.357744,-1.404641  
H,5.172233,-2.665097,-2.370346  
C,-6.362593,-2.34694,-0.928306  
H,-6.487049,-1.860433,-1.900211  
H,-6.814296,-3.341645,-1.006695  
H,-6.934587,-1.780699,-0.191202  
C,7.021349,-1.29991,-0.913396  
H,7.507622,-2.125773,-1.439563  
H,7.046646,-0.432208,-1.581954  
H,7.625247,-1.057075,-0.036398  
C,2.644622,-3.507013,-2.048075  
H,1.787098,-2.93419,-2.41465  
H,3.243723,-3.795378,-2.913808  
H,2.245277,-4.416429,-1.591516  
H,1.551944,-0.54255,-0.901492

|                                              |                             |
|----------------------------------------------|-----------------------------|
| Zero-point correction=                       | 0.848463 (Hartree/Particle) |
| Thermal correction to Energy=                | 0.899919                    |
| Thermal correction to Enthalpy=              | 0.900864                    |
| Thermal correction to Gibbs Free Energy=     | 0.756899                    |
| Sum of electronic and zero-point Energies=   | -2542.994262                |
| Sum of electronic and thermal Energies=      | -2542.942806                |
| Sum of electronic and thermal Enthalpies=    | -2542.941862                |
| Sum of electronic and thermal Free Energies= | -2543.085826                |

**Table S19** Cartesian coordinates and energy values of **7** in THF.

P,-0.489714,0.343871,-1.094784  
N,1.911516,1.78702,-1.326067  
N,1.015209,2.067501,0.63477  
C,-0.724696,-0.819176,0.339591  
C,0.335636,-1.581016,0.912892  
C,0.063661,-2.494009,1.939505  
H,0.886607,-3.059738,2.364108  
C,-1.232213,-2.722695,2.385151  
H,-1.424144,-3.445261,3.170714  
C,-2.280648,-2.035969,1.785906  
H,-3.302118,-2.225914,2.098463  
C,-2.05138,-1.094678,0.776966  
C,-3.262295,-0.430638,0.181642  
C,-3.766775,-0.86433,-1.063945  
C,-4.914738,-0.26623,-1.582995  
H,-5.293474,-0.608789,-2.541885  
C,-5.589978,0.751871,-0.909106  
C,-5.098995,1.143403,0.332972  
H,-5.618728,1.919268,0.888654  
C,-3.959247,0.561543,0.896123  
C,-3.543269,0.99908,2.283695  
H,-4.040719,0.394529,3.050599  
H,-3.823227,2.040524,2.461346  
H,-2.472028,0.892601,2.447068  
C,-3.098438,-1.971289,-1.845542  
H,-2.167745,-1.624443,-2.305026  
H,-3.752057,-2.326139,-2.645287

H,-2.846095,-2.820723,-1.20654  
 C,-6.803636,1.413551,-1.517033  
 H,-7.417713,1.899224,-0.755036  
 H,-7.429921,0.68989,-2.045617  
 H,-6.511691,2.181019,-2.242555  
 C,1.757169,-1.553082,0.415681  
 C,2.084694,-2.231353,-0.784079  
 C,3.409415,-2.26108,-1.21573  
 H,3.644602,-2.786854,-2.137259  
 C,4.442183,-1.658615,-0.492102  
 C,4.111308,-1.036511,0.706265  
 H,4.897826,-0.584747,1.304914  
 C,2.79394,-0.989528,1.18129  
 C,1.034821,-2.95743,-1.588306  
 H,0.462498,-3.647168,-0.962431  
 H,1.494979,-3.530029,-2.396448  
 H,0.323459,-2.250879,-2.024869  
 C,5.871461,-1.729443,-0.97619  
 H,6.270914,-2.745058,-0.882652  
 H,6.520632,-1.06617,-0.400096  
 H,5.953255,-1.449648,-2.030791  
 C,2.556142,-0.375576,2.543108  
 H,1.532085,-0.030782,2.668733  
 H,3.233963,0.464807,2.714085  
 H,2.743504,-1.107861,3.336706  
 C,0.871366,1.369005,-0.537653  
 C,2.686924,2.734595,-0.657905  
 C,2.133179,2.904472,0.57276  
 C,2.177809,1.284798,-2.663714  
 H,1.64479,0.340077,-2.771891  
 H,3.248233,1.12315,-2.793566  
 H,1.817629,1.980622,-3.426626  
 C,3.897151,3.35212,-1.272244  
 H,4.67421,2.608726,-1.477947  
 H,4.32399,4.09859,-0.602278  
 H,3.659865,3.851979,-2.216645  
 C,2.554677,3.776759,1.707033  
 H,1.821235,4.561031,1.92275  
 H,3.498367,4.269567,1.472445  
 H,2.70099,3.199834,2.625414  
 C,-0.033685,2.142327,1.637552  
 H,-0.994203,2.201401,1.120205  
 H,0.114875,3.028148,2.252612  
 H,-0.045271,1.260252,2.27793

|                                              |                             |
|----------------------------------------------|-----------------------------|
| Zero-point correction=                       | 0.598967 (Hartree/Particle) |
| Thermal correction to Energy=                | 0.633274                    |
| Thermal correction to Enthalpy=              | 0.634218                    |
| Thermal correction to Gibbs Free Energy=     | 0.533309                    |
| Sum of electronic and zero-point Energies=   | -1654.297079                |
| Sum of electronic and thermal Energies=      | -1654.262772                |
| Sum of electronic and thermal Enthalpies=    | -1654.261828                |
| Sum of electronic and thermal Free Energies= | -1654.362738                |

**Table S20** Cartesian coordinates and energy values of **H<sub>2</sub>O** in THF.

O,0.,0.,0.1187102  
 H,0.,0.75704,-0.4748408  
 H,0.,-0.75704,-0.4748408



|                                              |                             |
|----------------------------------------------|-----------------------------|
| Zero-point correction=                       | 0.021307 (Hartree/Particle) |
| Thermal correction to Energy=                | 0.024143                    |
| Thermal correction to Enthalpy=              | 0.025087                    |
| Thermal correction to Gibbs Free Energy=     | 0.003660                    |
| Sum of electronic and zero-point Energies=   | -76.432033                  |
| Sum of electronic and thermal Energies=      | -76.429198                  |
| Sum of electronic and thermal Enthalpies=    | -76.428254                  |
| Sum of electronic and thermal Free Energies= | -76.449680                  |

**Table S21** Cartesian coordinates and energy values of  $\text{NH}_3 \cdot \text{BH}_3$  in THF.

N,-0.0000000556,0.,0.730063  
H,0.769046,0.556361,1.09627  
H,0.0972996763,-0.9441939208,1.09627  
H,-0.866345843,0.3878329208,1.09627  
B,-0.0000000556,0.,-0.933407  
H,-0.120229,1.161239,-1.244073  
H,1.0657768905,-0.4764981798,-1.244073  
H,-0.9455480572,-0.6847408202,-1.244073

|                                              |                             |
|----------------------------------------------|-----------------------------|
| Zero-point correction=                       | 0.069657 (Hartree/Particle) |
| Thermal correction to Energy=                | 0.073467                    |
| Thermal correction to Enthalpy=              | 0.074411                    |
| Thermal correction to Gibbs Free Energy=     | 0.047209                    |
| Sum of electronic and zero-point Energies=   | -83.196059                  |
| Sum of electronic and thermal Energies=      | -83.192250                  |
| Sum of electronic and thermal Enthalpies=    | -83.191305                  |
| Sum of electronic and thermal Free Energies= | -83.218507                  |

**Table S22** Cartesian coordinates and energy values of  $\text{NH}_2\text{BH}_2$  in THF.

N,-0.6106870625,-0.00003425,-0.00002875  
H,-1.1630630625,0.84362875,-0.00009075  
H,-1.1628910625,-0.84390425,0.00031025  
B,0.7773449375,-0.00002625,-0.00005475  
H,1.3575459375,-1.04221025,-0.00003475  
H,1.3564929375,1.04285675,0.00029025

|                                              |                             |
|----------------------------------------------|-----------------------------|
| Zero-point correction=                       | 0.047739 (Hartree/Particle) |
| Thermal correction to Energy=                | 0.050975                    |
| Thermal correction to Enthalpy=              | 0.051919                    |
| Thermal correction to Gibbs Free Energy=     | 0.025338                    |
| Sum of electronic and zero-point Energies=   | -82.027773                  |
| Sum of electronic and thermal Energies=      | -82.024537                  |
| Sum of electronic and thermal Enthalpies=    | -82.023593                  |
| Sum of electronic and thermal Free Energies= | -82.050174                  |

## References

- S1 F. H. Stootman, D. M. Fisher, A. Rodger, J. R. Aldrich-Wright, *Analyst*, 2006, **131**, 1145–1151.
- S2 Z. Tošner, R. Andersen, B. Stevansson, M. Edén, N. C. Nielsena and T. Vosegaard, *J. Magn. Reson.*, 2014, **246**, 79–93.
- S3 J. J. Helmus and C. P. Jaroniec, *J. Biomol. NMR*, 2013, **55**, 355–367.
- S4 *International Tables for X-Ray Crystallography*; Kynoch Press: Birmingham, England, 1952, Vol. III.
- S5 *SAINT+*, version 6.02; Bruker AXS: Madison, WI, 1999.
- S6 L. Krause, R. Herbst-Irmer, G. M. Sheldrick and D. Stalke, *J. Appl. Cryst.*, 2015, **48**, 3–10.
- S7 G. M. Sheldrick, *Acta Cryst.*, 2015, **C71**, 3–8.
- S8 O. V. Dolomanov, L. J. Bourhis, R. J. Gildea, J. A. K. Howard and H. Puschmann, *J. Appl. Cryst.*, 2009, **42**, 339–341.
- S9 K. Brandenburg, *Diamond*, version 3.2k; Crystal Impact GbR: Bonn, Germany, 2015.
- S10 M. J. Frisch, G. W. Trucks, H. B. Schlegel, G. E. Scuseria, M. A. Robb, J. R. Cheeseman, G. Scalmani, V. Barone, B. Mennucci, G. A. Peterson, et al., Gaussian 16 Revision A.
- S11 M. Cossi, N. Rega, G. Scalmani and V. Barone, *J. Comp. Chem.*, 2003, **24**, 669–681.
- S12 a) F. Weigend, R. Ahlrichs, *Phys. Chem. Chem. Phys.*, 2005, **7**, 3297–3305; b) Y. Zhao, D. G. Truhlar, *Theor. Chem. Account*, 2008, **120**, 215–241; c) S. Grimme, J. Antony, S. Ehrlich, H. Krieg, *J. Chem. Phys.*, 2010, **132**, 154104.
- S13 K. B. Wiberg, *Tetrahedron*, 1968, **24**, 1083–1096.
- S14 R. Dennington, T. Keith and J. Millam, *Semichem Inc.*, Shawnee Mission, KS, GaussView, Version 5, 2009.
